# Supplementary material
Source: PubMed Central journal article supplement (PMC8111566)
Supplement: jamapediatr-e210347-s001.pdf [file jamapediatr-e210347-s001.pdf]

## Supplemental Online Content

Sun Z-W, Fu Y, Lu H-L, et al. Association of different rotavirus vaccines and with reduction in rotavirus gastroenteritis among in infants children younger than 5 years: a systematic review and meta-analysis of randomized clinical trials and observational studies. *JAMA Pediatr*. Published online May 10, 2021. doi:10.1001/jamapediatrics.2021.0347

### **eMethods.** Methods and Statistical Analysis

**eTable 1.** Included Criteria During Selection Process

**eTable 2.** The Criteria for grading methodological quality

**eTable 3.** The basis for grouping in sub-analysis

**eTable 4.** Characteristics of the Included RCTs, Case-control and Cohort studies

**eTable 5.** Estimated Pooled Vaccine Protection in Cohort Studies

**eTable 6.** Estimated Pooled Vaccine Protection against Severe RVGE Stratified by Income Development at Different Follow-up Times

**eTable 7.** Estimated Pooled Vaccine Protection against Severe RVGE Stratified by Income Development

**eTable 8.** Estimated Pooled Vaccine Protection against Severe AGE Stratified by Income Development at Different Follow-up Times

**eTable 9.** Estimated Pooled Vaccine Protection against RVGE Stratified by Income Development at Different Follow-up Times

**eTable 10.** Estimated Pooled Vaccine Protection against RVGE Hospitalization Stratified by Income Development at Different Follow-up Times

**eTable 11.** Estimated Pooled Vaccine Protection against RVGE Stratified by Income Development

**eTable 12.** Estimated Pooled Vaccine Protection against RVGE Hospitalization stratified by income development

**eTable 13.** Indirect Comparisons between RV1 and RV5 Stratified by Income Development

**eTable 14.** Indirect Comparisons between Different Vaccines in the Same Region

**eTable 15.** Random-effect Model of Strain-specific Rotavirus Vaccine Protection

**eFigure 1.** Flow Diagram

**eFigure 2.** The Risk of Serious Adverse Events Between Vaccine and Placebo Groups at Different Follow-up Times

**eFigure 3.** The Risk of Intussusception Between Vaccine and Placebo Groups at Different Follow-up Times

**eFigure 4.** All-Cause Mortality in Vaccine and Placebo Groups During the Follow-up Period

**eFigure 5.** Sensitivity Analysis

**eFigure 6.** Funnel Plots

This supplemental material has been provided by the authors to give readers additional information about their work.

## **Methods and Statistical Analysis**

### **Study selection**

Two reviewers (Sun ZW and Fu Y) independently screened the title, abstract and keywords of each EndNote record for relevance, and assessed in detail the full text of manuscripts for inclusion, with a third reviewer (Lu HL) consulted when necessary. Initial literature retrieval until July 1, 2018 produced 3998 articles and 241 full-text articles were assessed for eligibility. Updated research until July 1, 2020 produced 1131 articles and 50 full-text articles were assessed for eligibility. Seventeen studies were further identified from updated literature retrieval and 121 studies were finally included.

### **Data collection process**

We developed a standardized data extraction form including study methods, field-work dates, population sampled, recruitment site, sample size of vaccine and control groups, diagnostic assays used, vaccine type and title, vaccination schedule and rate of rotavirus cases, serious adverse events and seropositivity. Two reviewers (Sun ZW and Fu Y) independently extracted data and methodological quality of included trails and then rechecked the data with each other. For 10% of included studies, data were double extracted by a third author (Lu HL) to check for accuracy.

**eTable 1. Included Criteria During Selection Process**

1. Study design: Randomized controlled trials, Case-control studies or Cohort studies;
2. An original report of vaccine efficacy or effectiveness against rotavirus disease or assessing the safety or immunogenicity of rotavirus vaccine;
3. The efficacy, effectiveness, safety and immunogenicity of rotavirus vaccine were reported by vaccine types;
4. Rotavirus vaccines researched were licensed in global or regional market, including RV1, RV5, Rotavac, BRV-PV and LLR;
5. A sample size of at least 100 participants;
6. At least one full rotavirus season was included;
7. Enrolled population were normal children, younger than 5 years;
8. Clear reporting of the numbers of rotavirus cases and vaccination status;
9. Infants enrolled in RCTs should receive oral vaccines according to recommended schedules and recommended concentrations;
10. Rotavirus gastroenteritis should be confirmed by EIA or ELISA and genotyped by reverse transcription PCR.

**eTable 2. The Criteria for grading methodological quality**

| Assessment quality of RCTs in the <i>Cochrane Reviewers' Handbook</i>               |                                                                                                                                                           |
|-------------------------------------------------------------------------------------|-----------------------------------------------------------------------------------------------------------------------------------------------------------|
| Low quality                                                                         | If either randomization or allocation concealment was assessed at high risk of bias, regardless of the risk of other items.                               |
| High quality                                                                        | When both randomization and allocation concealment were assessed as a low risk of bias, and all other items were assessed at low or unclear risk of bias. |
| Moderate quality                                                                    | If a trial did not meet criteria for high or low quality.                                                                                                 |
| Assessment quality of observational studies with the Newcastle-Ottawa Scales (NOS). |                                                                                                                                                           |
| Low risk of bias                                                                    | Up to one item was judged inadequate in a study.                                                                                                          |
| Medium risk of bias                                                                 | Up to three items were judged inadequate in a study.                                                                                                      |
| High risk of bias                                                                   | More than three items were judged inadequate in a study.                                                                                                  |
| Very high risk of bias                                                              | There was no description of methods.                                                                                                                      |

**eTable 3. The basis for grouping studies in sub-analysis**

| The groups in sub-analysis      | Contents in each stratification                                                                           |
|---------------------------------|-----------------------------------------------------------------------------------------------------------|
| Economic development            |                                                                                                           |
| High-income countries           | GNI per capita $\geq$ US\$12,745                                                                          |
| Middle-income countries         | GNI per capita from US\$1,046 to US\$12,744                                                               |
| Low-income countries            | GNI per capita $\leq$ US\$1,045                                                                           |
| Rotavirus strain                |                                                                                                           |
| Homotypic strain                | Both G-type and P-type antigens of the circulating strain were in the vaccine                             |
| Partly heterotypic strain       | Either the G-type or the P-type antigen of the circulating strain was in the vaccine                      |
| Fully heterotypic strain        | Neither G-type nor P-type antigens of the circulating strain were in the vaccine                          |
| Single-antigen vaccine type     | Single G-type or P-type antigens of the circulating strain was in the vaccine, eg, G1, G2, G3, G4, and P8 |
| Single-antigen non-vaccine type | Single G-type or P-type antigens of the strain was not in the vaccine, eg, all other G-types or P-types   |
| Duration of follow-up           |                                                                                                           |
| First year follow-up            | The follow-up time was up to the first year or the first rotavirus season after vaccination               |
| Second year follow-up           | The follow-up time was up to the second year or the second rotavirus season after vaccination             |
| Two years follow-up             | The follow-up time was up to two years or two rotavirus seasons after vaccination                         |

**eTable 4. Characteristics of the Included RCTs, Case-control and Cohort studies**

| RCTs                      |                                         |                    |                               |                    |                    |                                                      |                      |                      |         |
|---------------------------|-----------------------------------------|--------------------|-------------------------------|--------------------|--------------------|------------------------------------------------------|----------------------|----------------------|---------|
| Countries or Regions      | Source                                  | Mean Age At Dose 1 | Vaccine Group / Placebo Group |                    |                    | Vaccination Schedule (Titer/Dose)                    | Follow-up Duration   | Main Genotype        | Quality |
|                           |                                         |                    | Male (%)                      | Breast Feeding (%) | Treatment          |                                                      |                      |                      |         |
| The USA                   | Bernstein et al,1999 <sup>1</sup>       | 12 wk              | 54/53                         | 48/56              | RV1(108/107)       | ≥10 <sup>5</sup> FFU/2 doses                         | 1 rotavirus season   | NA                   | M       |
|                           | Dennehy et al, 2005 <sup>2</sup>        | NA                 | NA                            | No restrict        | RV1(209/108)       | 10 <sup>6.4</sup> FFU/2 doses                        | 1 rotavirus season   | NA                   | H       |
|                           | Grant et al, 2012 <sup>3</sup>          | 9.8 wk             | 51/51                         | No restrict        | RV5(512/496)       | ≥10 <sup>7</sup> FFU/3 doses                         | 1 rotavirus season   | NA                   | H       |
| Europe (6 countries)      | Vesikari et al, 2007 <sup>4</sup>       | 11.5 wk            | 53/54                         | NA                 | RV1(2646/1348)     | 10 <sup>6.5</sup> FFU/2 dose                         | 2 rotavirus seasons  | G1P[8],G2P[4],G9P[8] | H       |
|                           | Vesikaria et al, 2010 <sup>5</sup>      | 10.4 wk            | 53/54                         | NA                 | RV1(914/490)       | ≥10 <sup>6</sup> FFU/2 dose                          | 1 rotavirus season   | NA                   | H       |
| Europe (5)                | Vesikari et al, 2009 <sup>6</sup>       | 9.8 wk             | 51/51                         | No restrict        | RV5(15278/15217)   | 6.7-12.4×10 <sup>7</sup> FFU/3 doses                 | 2 rotavirus seasons  | G1,G3,G4,G9          | H       |
| Finland                   | Vesikari et al, 2006 <sup>7</sup>       | NA                 | NA                            | No restrict        | RV5(328/322)       | 8×10 <sup>6</sup> FFU/3 doses                        | 3 rotavirus seasons  | NA                   | L       |
|                           | Vesikaria et al, 2011 <sup>8</sup>      | NA                 | NA                            | NA                 | RV1(100/50)        | ≥10 <sup>6</sup> FFU/2 dose                          | 2 rotavirus seasons  | NA                   | M       |
| Japan                     | Kawamura et al, 2011 <sup>9</sup>       | 7.7 wk             | NA                            | NA                 | RV1(508/257)       | ≥10 <sup>6</sup> FFU/2 doses                         | 2 rotavirus seasons  | NA                   | L       |
|                           | Iwata et al,2013 <sup>10</sup>          | 8 wk               | 54/52                         | NA                 | RV5(380/381)       | NA                                                   | 2 rotavirus seasons  | NA                   | H       |
| Korea                     | Kim et al, 2008 <sup>11</sup>           | 9 wk               | 60/52                         | No restrict        | RV5(115/63)        | 6.9×10 <sup>7</sup> -8.6×10 <sup>7</sup> FFU/ 3 does | 2 rotavirus seasons  | NA                   | L       |
|                           | Kim et al, 2012 <sup>12</sup>           | 8.8 wk             | 55/55                         | NA                 | RV1(508/176)       | ≥10 <sup>6</sup> FFU/2 doses                         | 1 rotavirus season   | NA                   | H       |
| Singapore                 | Phua et al, 2009 <sup>13</sup>          | 11.6 wk            | 51/51                         | NA                 | RV1(5359/5349)     | ≥10 <sup>6</sup> FFU/2 doses                         | 2 rotavirus seasons  | G1,G3,G9             | H       |
| Hong Kong                 | Phua et al, 2012 <sup>14</sup>          | 11.6 wk            | 51/51                         | NA                 | RV1(4359/4328)     | ≥10 <sup>6</sup> FFU/2 doses                         | 3 rotavirus seasons  | G1P[8],G3P[8],G9P[8] | H       |
| Taiwan                    | Phua et al, 2016 <sup>15</sup>          | 13.3 wk            | 50/50                         | NA                 | RV1(3274/3268)     | NA                                                   | 3 rotavirus seasons  | G1P[8],G3P[8],G9P[8] | H       |
|                           | Phua et al, 2005 <sup>16</sup>          | 13.3 wk            | 50/50                         | NA                 | RV1 (639/642)      | 10 <sup>6.1</sup> FFU/2 doses                        | 1 rotavirus season   | NA                   | L       |
| China                     | Li et al, 2014 <sup>17</sup>            | 9.6 wk             | NA                            | NA                 | RV1(1666/1667)     | ≥10 <sup>6</sup> FFU/2 doses                         | 2 rotavirus seasons  | G1P[8],G2P[4]        | M       |
|                           | Li et al, 2016 <sup>18</sup>            | 10 wk              | NA                            | NA                 | RV1(459/459)       | ≥10 <sup>6</sup> FFU/2 doses                         | 2 rotavirus seasons  | NA                   | M       |
| China (Hong Kong)         | Lau et al, 2013 <sup>19</sup>           | 11.6 wk            | 51/51                         | NA                 | RV1(1513/1512)     | ≥10 <sup>6</sup> FFU/2 doses                         | 2 rotavirus seasons  | G1,G3,G9             | H       |
| China (Guangxi)           | Mo et al, 2017 <sup>20</sup>            | 8.5 wk             | 51/53                         | NA                 | RV5(2020/2020)     | 2-2.8×10 <sup>6</sup> FFU/3 doses                    | 2 rotavirus seasons  | G1,G9,G3,G4          | M       |
| China (Guangxi)           | Mo et al, 2019 <sup>21</sup>            | 8.5 wk             | 51/53                         | NA                 | RV5(2020/2020)     | 2-2.8×10 <sup>6</sup> FFU/3 doses                    | 2 rotavirus seasons  | NA                   | M       |
| China (Taiwan)            | Chang et al, 2008 <sup>22</sup>         | NA                 | NA                            | NA                 | RV5(96/93)         | 6.5×10 <sup>7</sup> -1.2×10 <sup>8</sup> FFU/3 doses | 2 rotavirus seasons  | NA                   | L       |
| China (Henan)             | Xia et al, 2020 <sup>23</sup>           | 9.8 wk             | 50/50                         | NA                 | LLR (4993/4992)    | TCID <sub>50</sub> /ml titers/3 doses                | 2 rotavirus seasons  | G1,G2,G3,G4,G9       | H       |
| Bangladesh                | Colgate et al, 2016 <sup>24</sup>       | 10 wk              | 52/53                         | 50/54              | RV1(350350)        | NA                                                   | 1 rotavirus season   | NA                   | H       |
|                           | Zaman et al, 2009 <sup>25</sup>         | 6.1 wk             | 53/54                         | NA                 | RV1(196/98)        | 10 <sup>6.5</sup> FFU/2 doses                        | 1 rotavirus season   | NA                   | L       |
| Bangladesh                | Zaman et al, 2010 <sup>26</sup>         | 9 wk               | 54/49                         | No restrict        | RV5(568/568)       | 2×10 <sup>7</sup> FFU/3 doses                        | ≥3 rotavirus seasons | NA                   | H       |
| Vietnam                   | Anh et al, 2011 <sup>27</sup>           | 8.7 wk             | NA                            | NA                 | RV1(297/78)        | ≥10 <sup>6</sup> FFU/2 doses                         | 1 rotavirus season   | NA                   | H       |
| Philippines               |                                         | 8.5 wk             |                               |                    | RV1(300/75)        |                                                      |                      |                      |         |
| India                     | Narang et al, 2009 <sup>28</sup>        | 8.7 wk             | 49/57                         | NA                 | RV1(182/181)       | ≥10 <sup>6</sup> FFU/2 doses                         | 2 rotavirus seasons  | NA                   | M       |
|                           | Bhandari et al, 2009 <sup>29</sup>      | 8 wk               | 55/50                         | NA                 | Rotavac(92/90)     | ≥10 <sup>5</sup> FFU/3 doses                         | 2 rotavirus seasons  | NA                   | H       |
|                           | John et al, 2014 <sup>30</sup>          | NA                 | NA                            | No restrict        | Rotavac(4532/2267) | NA                                                   | 2 rotavirus seasons  | NA                   | M       |
|                           | Bhandari et al, 2014 <sup>31</sup>      | 6.8 wk             | 51/51                         | No restrict        | Rotavac(4532/2267) | ≥10 <sup>5</sup> FFU/3 doses                         | 2 rotavirus seasons  | NA                   | H       |
|                           | Kulkarniet al,2017 <sup>32</sup>        | 6 wk               | 50/51                         | No restrict        | BRV-PV(3749/3751)  | ≥10 <sup>5.6</sup> FFU/3 doses                       | 2 rotavirus seasons  | NA                   | M       |
| Latin America (6)         | Tregnaghi et al, 2011 <sup>33</sup>     | 8.6 wk             | NA                            | NA                 | RV1 (4376/2192)    | ≥10 <sup>6</sup> FFU/2 doses                         | 1 rotavirus season   | G9P[8],G2P[4]        | M       |
| Latin America (10)        | Linhares et al, 2008 <sup>34</sup>      | 8.3 wk             | 51/51                         | NA                 | RV1(10159/10010)   | 10 <sup>6.5</sup> FFU/2 doses                        | 2 rotavirus seasons  | G1P[8],G2P[4],G9P[8] | H       |
| Brazil, Mexico, Venezuela | Salinas et al, 2005 <sup>35</sup>       | 8.3 wk             | 53/50                         | NA                 | RV1 (540/537)      | 10 <sup>5.8</sup> FFU/2 doses                        | 1 rotavirus season   | G1,G9,G2             | H       |
| Mexico                    | Ruiz-Palacios et al, 2007 <sup>36</sup> | 7.7 wk             | 55/57                         | 50/52              | RV1 (102/101)      | 10 <sup>5.8</sup> FFU/2 doses                        | 1 rotavirus season   | G1,G2,G9             | H       |
| Brazil                    | Justino et al, 2012 <sup>37</sup>       | 9.8 wk             | 50/53                         | NA                 | RV1(328/325)       | 10 <sup>6.5</sup> FFU/2 doses                        | 2 rotavirus seasons  | G1P[8],G9P[8]        | H       |
| Jamaica                   | Christie et al, 2010 <sup>38</sup>      | 7.8 wk             | 53/50                         | NA                 | RV5(907/898)       | 6.7-12.4×10 <sup>7</sup> FFU/3 doses                 | 3 rotavirus seasons  | NA                   | H       |
| Niger                     | Isanaka et al, 2017 <sup>39</sup>       | 6.8 wk             | 50/49                         | No restrict        | BRV-PV(2044/2047)  | >10 <sup>5.6</sup> FFU/3 doses                       | 2 rotavirus seasons  | NA                   | H       |

|                                                          |                                         |        |       |             |                                                        |                                      |                     |                             |   |
|----------------------------------------------------------|-----------------------------------------|--------|-------|-------------|--------------------------------------------------------|--------------------------------------|---------------------|-----------------------------|---|
|                                                          | Coldiron et al, 2018 <sup>40</sup>      | 6 wk   | 50/49 | No restrict | BRV-PV(2044/2047)                                      | >10 <sup>5.6</sup> FFU/3 doses       | 2 rotavirus seasons | NA                          | H |
| South Africa, Malawi                                     | Madhi et al, 2010 <sup>41</sup>         | 6.4 wk | 50/49 | No restrict | RV1(3298/1641)                                         | 10 <sup>6.5</sup> FFU/2 doses        | 1 rotavirus season  | G1P[8]                      | H |
|                                                          | Steele et al, 2012 <sup>42</sup>        | 6.4 wk | 50/49 | No restrict | RV1(3298/1641)                                         | 10 <sup>6.5</sup> FFU/2 doses        | 2 rotavirus seasons | G1,G12,G8,P[8]              | H |
| South Africa                                             | Steele et al, 2010 <sup>43</sup>        | 6 wk   | NA    | NA          | RV1(190/96)                                            | ≥10 <sup>6</sup> FFU/2 doses         | 1 rotavirus season  | NA                          | L |
| Malawi                                                   | Cunliffe et al, 2012 <sup>44</sup>      | 6.5 wk | 49/50 | No restrict | RV1(1182/591)                                          | 10 <sup>6.5</sup> FFU/2 doses        | 2 rotavirus seasons | G12P[6],G9P[8],G1P[8]       | H |
| Colombia                                                 | Rojas et al, 2007 <sup>45</sup>         | 8.6 wk | 46/47 | NA          | RV1(159/160)                                           | 10 <sup>6.7</sup> FFU/2 doses        | 1 rotavirus season  | NA                          | L |
| Ghana                                                    | Armah et al, 2010 <sup>46</sup>         | 8.4 wk | 49/49 | No restrict | RV5(1098/1102)                                         | 2x10 <sup>7</sup> FFU/3 doses        | 2 rotavirus seasons | NA                          | H |
| Kenya                                                    |                                         | 7.3 wk | 48/49 |             | RV5(656/652)                                           |                                      |                     |                             |   |
| Mali                                                     |                                         | 6.9 wk | 53/51 |             | RV5(979/981)                                           |                                      |                     |                             |   |
| Ghana,Kenya, Mali                                        | Tapia et al, 2012 <sup>47</sup>         | 6 wk   |       | No restrict | RV5(2733/2735)                                         | 2x10 <sup>7</sup> FFU/3 doses        | 2 rotavirus seasons | G1P[8],G2P[4],G1P[6],G2P[6] | H |
| Mali                                                     | Sow et al, 2012 <sup>48</sup>           | 6.9 wk | 53/51 | No restrict | RV5(979/981)                                           | 2x10 <sup>7</sup> FFU/3 doses        | 2 rotavirus seasons | G1P[8],G2P[6],G1P[6],G2P[4] | H |
| Kenya                                                    | Laserson et al, 2012 <sup>49</sup>      | 6 wk   | NA    | NA          | RV5(649/643)                                           | 2x10 <sup>7</sup> FFU/3 doses        | 2 rotavirus seasons | NA                          | H |
| Bangui                                                   | Georges et al, 1991 <sup>50</sup>       | 3m     | NA    | NA          | RV5(230/232)                                           | 1x10 <sup>7</sup> FFU/3 doses        | 1 rotavirus season  | NA                          | L |
| Finland, Latin America (11)                              | Ruiz-Palacios et al, 2006 <sup>51</sup> | 8.3 wk | 51/51 | NA          | RV1(31673/31552)                                       | 10 <sup>6.5</sup> FFU/2 doses        | 1 rotavirus season  | G1P[8],G2P[4],G9P[8]        | H |
| Africa(Ghana,Kenya,Mali), Asia(Bangladesh, Vietnam)      | Breiman et al, 2012 <sup>52</sup>       | 6 wk   | NA    | No restrict | RV5(3751/3753)                                         | 2x10 <sup>7</sup> FFU/3 doses        | 2 rotavirus seasons | NA                          | H |
| America, Finland                                         | Block et al, 2007 <sup>53</sup>         | 10 wk  | 53/51 | NA          | RV5(651/661)                                           | 10 <sup>7</sup> FFU/3 doses          | 2 rotavirus seasons | NA                          | H |
| America, Europe (5), Latin American/Caribbean region (5) | Vesikari et al, 2006 <sup>54</sup>      | 9.8 wk | 51/51 | No restrict | RV5(34644/34630)                                       | 6.7-12.4x10 <sup>7</sup> FFU/3 doses | 2 rotavirus seasons | G1,G3,G4,G9                 | H |
|                                                          | Goveia et al, 2008 <sup>55</sup>        | 9.8 wk | 51/51 | No restrict | RV5(34644/34630)                                       | 6.7-12.4x10 <sup>7</sup> FFU/3 doses | 2 rotavirus seasons | G1,G3,G4,G9                 | H |
|                                                          | Dennehy et al, 2007 <sup>56</sup>       | 9.8 wk | 51/51 | No restrict | RV5(36271/35671)                                       | ≥10 <sup>7</sup> FFU/3 doses         | 1 rotavirus season  | NA                          | H |
| Europe United States Latin America                       | Vesikari et al, 2007 <sup>57</sup>      | 9.8 wk | 51/51 | No restrict | RV5(15057/15018)<br>RV5(16170/16178)<br>RV5(2713/2713) | 6.7-12.4x10 <sup>7</sup> FFU/3 doses | 2 rotavirus seasons | NA                          | H |

#### Case control studies

| Countries or Regions                  | Source                                 | Case Group / Control Group |          |                                    | Type of controls                       | Vaccination Schedule (Case/Control)                                             | Total Population (Case/Control)           | Main Genotype                | Risk                         |   |
|---------------------------------------|----------------------------------------|----------------------------|----------|------------------------------------|----------------------------------------|---------------------------------------------------------------------------------|-------------------------------------------|------------------------------|------------------------------|---|
|                                       |                                        | Mean Age                   | Male (%) | Breast Feeding (%)                 |                                        |                                                                                 |                                           |                              |                              |   |
| The USA                               | Cortese et al, 2013 <sup>58</sup>      | NA                         | NA       | No restrict                        | HRV(-) in hospital<br>Neighborhood     | RV1 full (22/101)<br>RV5 full (6/34)<br>RV1 full (19/644)<br>RV5 full (4/253)   | 95/140<br>89/1302                         | G1P[8],G2P[4],G12P[8],G3P[8] | H                            |   |
|                                       | Immergluck et al, 2016 <sup>59</sup>   | NA                         | 73/55    | 75/73                              | HRV(-) in hospital                     | RV1 full (16/48)<br>RV1 partial (3/4)<br>RV5 full (22/34)<br>RV5 partial (5/10) | 92/134                                    | G12P[8],G3P[8]               | L                            |   |
|                                       | Staat et al,2011 <sup>60</sup>         | 13m/12m                    | 52/53    | NA                                 | Nondiarrhea controls in hospital       | HRV(-) in hospital                                                              | RV5 full (16/87)<br>RV5 partial (16/91)   | 159/329                      | G3,G9,G1                     | L |
|                                       |                                        |                            |          |                                    |                                        | RV5 full (17/195)<br>RV5 partial (17/168)                                       | 183/675                                   |                              |                              |   |
|                                       | Tate et al, 2013 <sup>61</sup>         | 23m/12m                    | NA       | 70/63<br>70/57                     | Nondiarrhea controls in hospital       | HRV(-) in hospital                                                              | RV5 full (22/164)<br>RV5 partial (17/129) | 158/490                      | NA                           | H |
|                                       |                                        |                            |          |                                    |                                        | RV5 full (22/187)<br>RV5 partial (17/127)                                       | 158/500                                   |                              |                              |   |
|                                       | Donauer et al, 2013 <sup>62</sup>      | NA                         | 45/52    | 50/60                              | Nondiarrhea controls in hospital       | Neighborhood                                                                    | RV5 full (2/329)<br>RV5 partial (8/165)   | 76/743                       | G1P[8],G12P[8],G2P[4],G8P[9] | H |
| HRV(-) in hospital                    |                                        |                            |          |                                    |                                        | RV5 full (2/15)<br>RV5 partial (8/47)                                           | 76/179                                    |                              |                              |   |
| RV5 full (2/27)<br>RV5 partial (8/71) |                                        |                            |          |                                    |                                        | 76/288                                                                          |                                           |                              |                              |   |
| Boom et al, 2010 <sup>63</sup>        | 17m/10m                                | 66/58                      | NA       | Nondiarrhea controls in hospital   | HRV(-) in hospital                     | RV5 full (5/32)<br>RV5 partial (7/29)                                           | 79/108                                    | G3P[8],G1P[8]                | L                            |   |
|                                       |                                        |                            |          |                                    | RV5 full (5/44)<br>RV5 partial(7/71)   | 79/206                                                                          |                                           |                              |                              |   |
| Cortese et al, 2011 <sup>64</sup>     | NA                                     | NA                         | NA       | HRV(-) in hospital<br>Neighborhood | RV5 full (28/163)<br>RV5 full (23/810) | 402/825                                                                         | NA                                        | L                            |                              |   |
| Quebec                                | Doll et al, 2015 <sup>65</sup>         | 16.6m/12.6m                | 38/56    | NA                                 | HRV(-) in hospital                     | RV1 partial (1/26)<br>RV1 full (7/74)                                           | 32/342                                    | NA                           | H                            |   |
| El Salvador                           | Palma et al, 2010 <sup>66</sup>        | 10 m/10m                   | 64/50    | 91/93                              | Neighborhood                           | RV1 full (152/617)<br>RV1 partial (72/199)                                      | 323/969                                   | NA                           | L                            |   |
| Belgium                               | Braeckman et al, 2012 <sup>67</sup>    | 13m/12.6m                  | 51/54    | 2/4                                | Nondiarrhea controls in hospital       | RV1 full (66/165)<br>RV1 partial (70/94)                                        | 215/276                                   | G1P[8],G2P[4]                | L                            |   |
|                                       | Matthijnsens et al, 2014 <sup>68</sup> | NA                         | NA       | NA                                 | Nondiarrhea controls in hospital       | RV1 full (70/179)<br>RV1 partial (88/78)                                        | 248/276                                   | G2P[4],G1P[8],G4P[8],G3P[8]  | L                            |   |
| Spain                                 | Castilla et al,2012 <sup>69</sup>      | NA                         | 54/56    | NA                                 | HRV(-) in hospital                     | RV1 full (19/459)<br>RV1 partial(2/67)                                          | 756/6036                                  | NA                           | M                            |   |

|                   |                                          |             |           |       |                                  | RV5 full (15/390)<br>RV5 partial (9/168)                                      |                      |                                  |   |
|-------------------|------------------------------------------|-------------|-----------|-------|----------------------------------|-------------------------------------------------------------------------------|----------------------|----------------------------------|---|
| England           | Walker et al, 2019 <sup>70</sup>         | 19.4w/20.4w | 53.7/53.5 | NA    | HRV(-) in hospital               | RV1 full (1126/653)<br>RV1 partial(186/130)                                   | 1702/956             | NA                               | M |
| Germany           | Oberle et al, 2020 <sup>71</sup>         | 7.7m/7.8m   | 70.7/68.4 | NA    | Neighborhood                     | RV1 partial(35/78)<br>RV5 partial(21/48)                                      | 116/272              | NA                               | L |
| Moldova           | Gheorghita et al, 2016 <sup>72</sup>     | 11.6m/11.6m | 51/57     | NA    | HRV(-) in hospital               | RV1 full (14/348)<br>RV1 partial (4/51)                                       | 100/852              | NA                               | L |
| Australia         | Snelling et al, 2009 <sup>73</sup>       | NA          | NA        | NA    | HRV(-) in hospital               | RV1 full (11/72)<br>RV1 partial (10/48)                                       | 42/166               | G9P[8],G1P[8]                    | L |
|                   | Carlin et al, 2013 <sup>74</sup>         | <12m        | NA        | NA    | Neighborhood                     | RV1 partial (120/1078)<br>RV5 partial (135/1186)                              | 137/1319<br>164/1453 | NA                               | M |
|                   | Maguire et al, 2019 <sup>75</sup>        | 25m         | NA        | NA    | Neighborhood                     | RV1 full (1977/24902)<br>RV1 partial (184/1808)                               | 2931/29273           | NA                               | H |
| Japan             | Araki et al, 2018 <sup>76</sup>          | 19/15m      | 55/54     | 30/44 | HRV(-) in hospital               | RV1 full (36/226)<br>RV1 full (27/179)                                        | 487/925              | G1P[8],G9P[8],G2P[4]             | M |
|                   | Araki et al, 2018 <sup>77</sup>          | 16m/13m     | 53/56     | NA    | HRV(-) in hospital               | RV1 full (3/41)<br>RV5 full (0/38)                                            | 64/260               | NA                               | M |
|                   |                                          |             | 53/48     |       | Nondiarrhea controls in hospital | RV1 full (23/121)<br>RV5 full (0/53)                                          | 64/589               |                                  |   |
| Philippines       | Lopez et al, 2018 <sup>78</sup>          | 11m/11m     | 57/59     | NA    | HRV(-) in hospital               | RV1 full (92/233)<br>RV1 partial (20/44)                                      | 203/397              | NA                               | M |
| Israel            | Muhsen et al, 2018 <sup>79</sup>         | NA          | 55/53     | NA    | HRV(-) in hospital               | RV5 full (46/363)<br>RV5 partial (26/203)                                     | 98/628               | G1P[8],G3P[8],<br>G9P[8],G2P[4]  | L |
| Uzbekistan        | Eraliev et al, 2020 <sup>80</sup>        | ≥6m         | NA        |       | HRV(-) in hospital               | RV1 full (76/400)                                                             | 102/499              | NA                               | H |
| China (Taiwan)    | Chang et al, 2014 <sup>81</sup>          | 20.5m/18.2m | NA        | NA    | HRV(-) in hospital               | RV1 full (3/121)<br>RV1 partial (0/6)<br>RV5 full (0/82)<br>RV5 partial (0/5) | 184/904              | G1P[8],G2P[4],G3P[8],<br>G9P[8]  | M |
|                   |                                          | 20.5m/19m   |           |       | Nondiarrhea controls in hospital | RV1 full (3/154)<br>RV1 partial (0/4)<br>RV5 full (0/90)<br>RV5 partial (0/3) | 184/909              |                                  |   |
| China (Guangzhou) | Fu et al,2007 <sup>82</sup>              | 17.1m/15.7m | NA        | NA    | HRV(-) in hospital               | LLR full (0/6)<br>LLR partial (90/186)                                        | 838/838              | NA                               | H |
|                   |                                          | 13.3m/12.5m | 65/65     | NA    | Nondiarrhea controls in hospital | LLR full (9/19)<br>LLR partial(383/587)                                       | 3130/3607            | NA                               | L |
| China (Hebei)     | Zhen et al, 2015 <sup>84</sup>           | NA          | NA        | NA    | HRV(-) in hospital               | LLR                                                                           | 305/1220             | G3,G1,G9                         | M |
| China (Beijing)   | Li et al, 2019 <sup>85</sup>             | NA          | 65/59     | NA    | HRV(-) in hospital               | LLR                                                                           | 598/1766             | G9,G3,G2                         | M |
| Nicaragua         | Patel et al, 2009 <sup>86</sup>          | 10m/8m      | 56/52     | 92/92 | Neighborhood                     | RV5 full (42/137)<br>RV5 partial(116/349)                                     | 285/840              | NA                               | L |
|                   |                                          |             | 56/54     |       | HRV(-) in hospital               | RV5 full (42/120)<br>RV5 partial(116/262)                                     | 285/690              |                                  |   |
|                   | Mast et al, 2011 <sup>87</sup>           | 14m/14m     | 59/56     | 93/93 | HRV(-) in hospital               | RV5 full (241/711)                                                            | 502/1894             | G3,G9,P[1],P[8]                  | M |
|                   |                                          |             | 59/52     | 93/94 | Neighborhood                     | RV5 full (241/812)                                                            | 502/1685             |                                  |   |
|                   | Patel et al, 2012 <sup>88</sup>          | 14m/11m     | 54/58     | 92/94 | HRV(-) in hospital               | RV5 full (773/3097)                                                           | 1016/4930            | NA                               | M |
|                   |                                          | 14m/14m     | 54/52     | 92/95 | Nondiarrhea controls in hospital | RV5 full (773/3914)                                                           | 1016/5627            |                                  |   |
| Guatemala         | Gastañaduy et al, 2016 <sup>89</sup>     | 12m/14m     | 66/53     | 89/90 | Nondiarrhea controls in hospital | RV1 full (41/175)<br>RV5 full (19/78)                                         | 213/657              | G1P[8]                           | M |
|                   |                                          | 12m/11m     | 66/59     | 89/90 | HRV(-) in hospital               | RV1 full (41/90)<br>RV5 full (19/27)                                          | 213/334              |                                  |   |
| Brazil            | Correia et al, 2010 <sup>90</sup>        | 14m/12m     | 73/54     | NA    | HRV(-) in hospital               | RV1 full (43/317)                                                             | 70/484               | G2P[4]                           | H |
|                   |                                          | 14m/19m     | 73/58     |       | Nondiarrhea controls in hospital | RV1 full(43/310)                                                              | 70/416               |                                  |   |
|                   | Patel et al, 2013 <sup>91</sup>          | 12m/12m     | 65/56     | 93/94 | HRV(-) in hospital               | RV1 full (208/510)<br>RV1 partial(100/131)                                    | 400/718              | G9P[8],G3P[8],G2P[4],<br>G9P[6]  | L |
|                   |                                          |             | 65/54     | 93/97 | Nondiarrhea controls in hospital | RV1 full (208/857)<br>RV1 partial(100/226)                                    | 400/1200             |                                  |   |
|                   | Ichihara et al, 2014 <sup>92</sup>       | 14m/14m     | NA        | NA    | Nondiarrhea controls in hospital | RV1 full (115/1481)<br>RV1 partial (33/279)                                   | 215/1961             | G2P[4],G1P[8]                    | M |
|                   | Justino et al, 2011 <sup>93</sup>        | 16m/18m     | 51/53     | NA    | Nondiarrhea controls in hospital | RV1 full (289/308)<br>RV1 partial (77/79)                                     | 538/507              | G2P[4],G1P[8],G2P[6],<br>G12P[6] | L |
|                   |                                          | 16m/17m     | 51/55     |       | Neighborhood                     | RV1 full (289/256)<br>RV1 partial (77/39)                                     | 538/346              |                                  |   |
| Brazil            | Patel et al, 2011 <sup>94</sup>          | 5.5m        | NA        | NA    | Neighborhood                     | RV1 (312/1264)                                                                | 330/1311             | NA                               | L |
| Mexico            |                                          | 5.2m        |           |       |                                  | RV1 (260/672)                                                                 | 285/739              |                                  |   |
| Bolivia           | Pringle et al, 2016 <sup>95</sup>        | 13m/14m     | 64/61     | 97/96 | HRV(-) in hospital               | RV1 full (264/345)<br>RV1 partial (60/57)                                     | 356/420              | G9,P[8],G3,P[6]                  | L |
| Colombia          | Cotes-Cantillo et al, 2014 <sup>96</sup> | 17m/15m     | 61/58     | 84/86 | Nondiarrhea controls in hospital | RV1 full (143/670)<br>RV1 partial (17/90)                                     | 173/801              | NA                               | M |
| Zambia            | Beres et al, 2016 <sup>97</sup>          | 8m/8m       | 49/50     | NA    | HRV(-) in hospital               | RV1 full (70/238)<br>RV1 partial (16/44)                                      | 144/458              | NA                               | L |
| Malawi            | Bar-Zeev et al, 2015 <sup>98</sup>       | 8.9m/9.4m   | NA        | 91/92 | HRV(-) in hospital               | RV1 full (81/234)<br>RV1 partial (9/30)                                       | 118/317              | G2P[4],G1P[8],G12P[6],<br>G2P[6] | L |
|                   |                                          | 8.9m/8.8m   |           | NA    | Neighborhood                     | RV1 full (81/286)<br>RV1 partial (9/42)                                       | 118/380              |                                  |   |
| South Africa      | Groome et al, 2014 <sup>99</sup>         | 9m/10m      | 56/56     | 65/63 | HRV(-) in hospital               | RV1 full (278/856)<br>RV1 partial(126/334)                                    | 540/1434             | G12P[8],G2P[4],G1P[8],<br>G9P[8] | L |
|                   |                                          | 9m/8m       | 56/57     | 65/62 | Nondiarrhea controls in hospital | RV1 full (278/697)<br>RV1 partial(126/232)                                    | 540/1069             |                                  |   |

|              |                                       |             |       |       |                    |                                            |          |               |   |
|--------------|---------------------------------------|-------------|-------|-------|--------------------|--------------------------------------------|----------|---------------|---|
|              | Groome et al, 2019 <sup>100</sup>     | NA          | NA    | NA    | Neighborhood       | RV1                                        | 169/169  | NA            | H |
| Botswana     | Gastañaduy et al, 2016 <sup>101</sup> | 9m/8m       | 52/57 | 47/55 | HRV(-) in hospital | RV1 full (162/288)<br>RV1 partial (37/51)  | 242/368  | NA            | H |
|              | Mokomane et al, 2018 <sup>102</sup>   | 9m/8m       | 52/57 | 47/45 | HRV(-) in hospital | RV1 full (121/288)<br>RV1 partial (29/51)  | 242/368  | NA            | M |
| Ghana        | Armah et al, 2016 <sup>103</sup>      | 11.3m/11.5m | 52/60 | 99/98 | HRV(-) in hospital | RV1 full (197/428)<br>RV1 partial (0/9)    | 207/450  | NA            | L |
| Burkina Faso | Bonkougou et al, 2018 <sup>104</sup>  | 12m/10m     | 61/57 | NA    | HRV(-) in hospital | RV5 full (133/488)<br>RV5 partial (12/44)  | 227/761  | NA            | L |
| Rwanda       | Tate et al, 2016 <sup>105</sup>       | 15.5m/10m   | 56/63 | NA    | HRV(-) in hospital | RV5 full (5/49)<br>RV5 partial (7/7)       | 48/152   | NA            | M |
| Zimbabwe     | Mujuru et al, 2018 <sup>106</sup>     | 12m/13m     | 57/58 | NA    | HRV(-) in hospital | RV1 full (853/2527)<br>RV1 partial (15/45) | 903/2685 | NA            | M |
| Kenya        | Khagayi et al, 2019 <sup>107</sup>    | 9.7m/9.8m   | 45/49 | NA    | HRV(-) in hospital | RV1 full (51/308)<br>RV1 partial (7/41)    | 91/418   | G1P[8],G2P[4] | M |

### Cohort studies

| Countries or Regions | Source                                      | Study design  | Vaccinated Group / Unvaccinated Group |          |                                                                                                     | Vaccination Schedule                              | Follow-up time      | Main Genotype         | Risk |
|----------------------|---------------------------------------------|---------------|---------------------------------------|----------|-----------------------------------------------------------------------------------------------------|---------------------------------------------------|---------------------|-----------------------|------|
|                      |                                             |               | Age (Mean)                            | Male (%) | Vaccinated (N)                                                                                      |                                                   |                     |                       |      |
| The USA              | Wang et al, 2010 <sup>108</sup>             | retrospective | 7m/7m                                 | 51%/51%  | RV5 (33140/26167)                                                                                   | 3 doses                                           | 2 rotavirus seasons | NA                    | L    |
|                      | Wang et al, 2013 <sup>109</sup>             | prospective   | 2m/2m                                 | 51%/51%  | RV5 (42306/28417)<br>RV5 (43704/31810)                                                              | ≥1 dose<br>2 doses                                | 2 rotavirus seasons | NA                    | L    |
|                      | Shui et al, 2012 <sup>110</sup>             | retrospective | 4-34w                                 | NA       | RV5(309844/389026)                                                                                  | ≥1 dose                                           | 30 days             | NA                    | M    |
|                      | Krishnarajah et al, 2017 <sup>111</sup>     | prospective   | NA                                    | 52%/53%  | RV1(34928/182269)<br>RV1 (8390/182269)                                                              | 2 doses<br>1 dose                                 | 1 rotavirus season  | NA                    | L    |
|                      | Hoffman et al, 2017 <sup>112</sup>          | retrospective | NA                                    | NA       | RV1(57931/173384)                                                                                   | ≥1 dose                                           | 59 days             | NA                    | M    |
| Canada (Quebec)      | Gosselina et al, 2016 <sup>113</sup>        | prospective   | NA                                    | 51%/52%  | RV1 (4767/1239)                                                                                     | 2 doses                                           | 2 years             | NA                    | L    |
|                      |                                             | retrospective |                                       | 51%/51%  | RV1 (266/1239)<br>RV1 (4767/6436)<br>RV1 (266/6436)                                                 | 1 dose<br>2 doses<br>1 dose                       |                     |                       |      |
| Poland               | Budzyn et al, 2016 <sup>114</sup>           | retrospective | 2.9y/2.6y                             | 51%/51%  | RV1 (303/303)                                                                                       | 2 doses                                           | 5 years             | NA                    | M    |
| Spain                | Pérez-Vilar et al, 2015 <sup>115</sup>      | retrospective | NA                                    | 52%/52%  | RV1 (3604/96643)<br>RV1 (24723/96643)<br>RV5 (34865/96643)<br>RV5 (10130/96643)<br>RV5 (8563/96643) | 2 doses<br>1 dose<br>3 doses<br>2 doses<br>1 dose | 3 years             | NA                    | L    |
| France               | Gagneur et al, 2011 <sup>116</sup>          | prospective   | NA                                    | NA       | RV5 (1895/2102)                                                                                     | 3 doses                                           | 2 years             | NA                    | M    |
| Israel               | Muhsena et al, 2010 <sup>117</sup>          | prospective   | NA                                    | NA       | RV1 (6870/18591)<br>RV1 (716/18591)                                                                 | 2 doses<br>1 dose                                 | 2 rotavirus seasons | NA                    | L    |
| Bangladesh           | Zaman et al, 2017 <sup>118</sup>            | prospective   | NA                                    | NA       | RV1 (5837/5267)                                                                                     | ≥1 dose                                           | 2 years             | G12P[8],G1P[8],G9P[8] | L    |
| Thailand             | Tharmaphornpilas et al, 2017 <sup>119</sup> | prospective   | NA                                    | 52%/50%  | RV1 (3622/2472)                                                                                     | ≥1 dose                                           | 2 years             | NA                    | L    |
| Brazil               | Vieira et al, 2011 <sup>120</sup>           | prospective   | 6.6m/15.3m                            | 51%/49%  | RV1 (222/222)                                                                                       | 2 doses                                           | 2 years             | G2P[4]                | H    |
| Malawi               | Bar-Zeev et al, 2018 <sup>121</sup>         | prospective   | NA                                    | NA       | RV1 (26086/1724)<br>RV1 (563/1724)                                                                  | 2 doses<br>1 dose                                 | 1 year              | NA                    | M    |
|                      |                                             | retrospective |                                       |          | RV1 (26649/7690)                                                                                    | ≥1 dose                                           |                     |                       |      |

**Table 5. Estimated Pooled Vaccine Protection in Cohort Studies**

| Study                                   | Setting         | Income | Vaccine | Vaccinated Dose | Cohort years | Study design  | Incidence among vaccinated (N) | Incidence among unvaccinated (N) | RR (95% CI)             |
|-----------------------------------------|-----------------|--------|---------|-----------------|--------------|---------------|--------------------------------|----------------------------------|-------------------------|
| <b>Hospitalisation for RVGE</b>         |                 |        |         |                 |              |               |                                |                                  |                         |
| Tharmaphornpilas et al.2017             | Thailand        | UMIC   | RV1     | ≥1 dose         | 2            | prospective   | 10/3622                        | 55/2472                          | 0.124 (0.063, 0.243)    |
| Gosselina et al.2016                    | Quebec (Canada) | HIC    | RV1     | 2 doses         | 2            | prospective   | 1/4767                         | 1/1239                           | 0.260 (0.063, 4.152)    |
|                                         |                 |        |         | 2 doses         | 2            | retrospective | 1/4767                         | 21/6436                          | 0.064 (0.063, 0.478)    |
|                                         |                 |        |         | 1 dose          | 2            | prospective   | 1/266                          | 1/1239                           | 4.658 (2.063, 74.233)   |
|                                         |                 |        |         | 1 dose          | 2            | retrospective | 1/266                          | 24/6436                          | 1.008 (1.063, 7.424)    |
| Krishnarajah et al.2017                 | the USA         | HIC    | RV1     | 2 doses         | 5            | prospective   | 7/61035                        | 526/370086                       | 0.081 (0.063, 0.170)    |
|                                         |                 |        |         | 1 dose          | 5            | prospective   | 3/14500                        | 820/370086                       | 0.093 (0.063, 0.290)    |
| Pérez-Vilar et al.2015                  | Spain           | HIC    | RV1     | 2 doses         | 3            | retrospective | 20/21119                       | 616/96643                        | 0.149 (0.063, 0.232)    |
|                                         |                 |        |         | 1 dose          | 3            | retrospective | 3/24723                        | 616/96643                        | 0.019 (0.063, 0.059)    |
|                                         |                 |        |         | RV5             | 3            | retrospective | 12/34865                       | 616/96643                        | 0.054 (0.063, 0.096)    |
|                                         |                 |        |         | 1 dose          | 3            | retrospective | 7/53558                        | 616/96643                        | 0.021 (0.063, 0.043)    |
|                                         |                 |        |         | 2 doses         | 3            | retrospective | 5/44995                        | 616/96643                        | 0.017 (0.063, 0.042)    |
| Wang et al.2010                         | the USA         | HIC    | RV5     | 3 doses         | 2            | prospective   | 0/33140                        | 23/26167                         | 0.017 (0.063, 0.277)    |
| Wang et al.2013                         | the USA         | HIC    | RV5     | 1 dose          | 2            | prospective   | 2/42306                        | 11/28417                         | 0.122 (0.063, 0.551)    |
|                                         |                 |        |         | 2 doses         | 2            | prospective   | 1/43704                        | 13/31810                         | 0.056 (0.063, 0.428)    |
| Gagneur et al.2011                      | France          | HIC    | RV5     | 3 doses         | 2            | prospective   | 1/1895                         | 47/2102                          | 0.024 (0.063, 0.171)    |
| <b>Hospitalisation for AGE</b>          |                 |        |         |                 |              |               |                                |                                  |                         |
| Tharmaphornpilas et al.2017             | Thailand        | UMIC   | RV1     | ≥1 dose         | 2            | prospective   | 203/3622                       | 232/2472                         | 0.597 (0.498, 0.716)    |
| Gosselina et al. 2016                   | Quebec (Canada) | HIC    | RV1     | 2 doses         | 2            | prospective   | 20/4767                        | 11/1239                          | 0.473 (0.227, 0.984)    |
|                                         |                 |        |         | 2 doses         | 2            | retrospective | 20/4767                        | 73/6436                          | 0.370 (0.226, 0.606)    |
|                                         |                 |        |         | 1 dose          | 2            | prospective   | 8/266                          | 11/1239                          | 3.388 (1.376, 8.341)    |
|                                         |                 |        |         | 1 dose          | 2            | retrospective | 8/266                          | 87/6436                          | 2.225 (1.090, 4.542)    |
| Krishnarajah et al.2017                 | the USA         | HIC    | RV1     | 2 doses         | 5            | prospective   | 729/61035                      | 8209/370086                      | 0.538 (0.499, 0.581)    |
|                                         |                 |        |         | 1 dose          | 5            | prospective   | 248/14500                      | 8209/370086                      | 0.771 (0.680, 0.874)    |
| Wang et al.2010                         | the USA         | HIC    | RV5     | 3 doses         | 2            | prospective   | 87/33140                       | 160/26167                        | 0.429 (0.331, 0.557)    |
| Wang et al.2013                         | the USA         | HIC    | RV5     | 1 dose          | 2            | prospective   | 53/42306                       | 63/28417                         | 0.565 (0.392, 0.814)    |
|                                         |                 |        |         | 2 doses         | 2            | prospective   | 78/43704                       | 98/31810                         | 0.579 (0.430, 0.780)    |
| Pérez-Vilar et al.2015                  | Spain           | HIC    | RV1     | ≥1 dose         | 3            | retrospective | 230/24723                      | 1552/96643                       | 0.579 (0.505, 0.665)    |
|                                         |                 |        |         | RV5             | ≥1 dose      | 3             | retrospective                  | 332/53558                        | 1552/96643              |
| <b>Community consultations for RVGE</b> |                 |        |         |                 |              |               |                                |                                  |                         |
| Zaman et al.2017                        | Bangladesh      | LMIC   | RV1     | ≥1 dose         | 1            | prospective   | 75/2464                        | 135/2340                         | 0.528 (0.400, 0.696)    |
|                                         |                 | LMIC   | RV1     | ≥1 dose         | 2            | prospective   | 102/4116                       | 172/3893                         | 0.561 (0.441, 0.714)    |
| Vieira et al.2011                       | Brazil          | LIC    | RV1     | 2 doses         | 2            | prospective   | 10/180                         | 6/147                            | 1.361 (0.507, 3.657)    |
| Dorota et al.2016                       | Poland          | HIC    | RV1     | 2 doses         | 5            | retrospective | 33/303                         | 62/303                           | 0.532 (0.360, 0.787)    |
| Krishnarajah et al.2017                 | the USA         | HIC    | RV1     | 2 doses         | 1            | prospective   | 11/34928                       | 449/182269                       | 0.128 (0.070, 0.232)    |
|                                         |                 |        |         | 1 dose          | 1            | prospective   | 3/8390                         | 449/182269                       | 0.145 (0.047, 0.452)    |
|                                         |                 |        |         | 2 doses         | 5            | prospective   | 17/61035                       | 820/370086                       | 0.126 (0.078, 0.203)    |
|                                         |                 |        |         | 1 dose          | 5            | prospective   | 7/14500                        | 820/370086                       | 0.218 (0.104, 0.458)    |
| Wang et al.2010                         | the USA         | HIC    | RV5     | 3 doses         | 2            | prospective   | 1/33140                        | 43/26167                         | 0.018 (0.003, 0.133)    |
| Wang et al.2013                         | the USA         | HIC    | RV5     | 1 dose          | 2            | prospective   | 2/42306                        | 18/28417                         | 0.075 (0.017, 0.322)    |
|                                         |                 |        |         | 2 doses         | 2            | prospective   | 5/43704                        | 18/31810                         | 0.202 (0.075, 0.545)    |
| <b>Community consultations for AGE</b>  |                 |        |         |                 |              |               |                                |                                  |                         |
| Vieira et al.2011                       | Brazil          | LIC    | RV1     | 2 doses         | 1            | prospective   | 193/222                        | 187/222                          | 1.032 (0.956, 1.114)    |
| Muhsena et al.2010                      | Israel          | HIC    | RV1     | 2 doses         | 1            | prospective   | 1605/6870                      | 8801/18591                       | 0.494 (0.472, 0.516)    |
|                                         |                 |        |         | 1 dose          | 1            | prospective   | 153/716                        | 8801/18591                       | 0.451 (0.392, 0.520)    |
| Krishnarajah et al.2017                 | the USA         | HIC    | RV1     | 2 doses         | 5            | prospective   | 7336/61035                     | 53019/370086                     | 0.839 (0.820, 0.858)    |
|                                         |                 |        |         | 1 dose          | 5            | prospective   | 1812/14500                     | 53019/370086                     | 0.872 (0.835, 0.911)    |
| Wang et al.2010                         | the USA         | HIC    | RV5     | 3 doses         | 2            | prospective   | 1408/33140                     | 1537/26167                       | 0.723 (0.674, 0.776)    |
| Wang et al.2013                         | the USA         | HIC    | RV5     | 1 dose          | 2            | prospective   | 704/42306                      | 584/28417                        | 0.810 (0.726, 0.903)    |
|                                         |                 |        |         | 2 doses         | 2            | prospective   | 852/43704                      | 945/31810                        | 0.656 (0.599, 0.719)    |
| Getachew et al.2018                     | the USA         | HIC    | RV1     | ≥1 dose         | 5            | retrospective | 9192/10000                     | 9818/10000                       | 0.936 (0.930, 0.942)    |
|                                         |                 |        |         | RV5             | ≥1 dose      | 5             | retrospective                  | 8205/10000                       | 8474/10000              |
| <b>Severe RVGE</b>                      |                 |        |         |                 |              |               |                                |                                  |                         |
| Zaman et al.2017                        | Bangladesh      | LMIC   | RV1     | ≥1 dose         | 1            | prospective   | 53/2472                        | 101/2351                         | 0.499 (0.360, 0.693)    |
|                                         |                 | LMIC   | RV1     | ≥1 dose         | 2            | prospective   | 75/4136                        | 130/3919                         | 16.625 (13.248, 20.862) |
| Vieira et al.2011                       | Brazil          | LIC    | RV1     | 2 doses         | 2            | prospective   | 5/180                          | 4/147                            | 1.021 (0.279, 3.733)    |
| <b>Diarrhoea-associated death</b>       |                 |        |         |                 |              |               |                                |                                  |                         |
| Bar-Zeev et al.2018                     | Malawi          | LIC    | RV1     | 2 doses         | 1            | prospective   | 91/26086                       | 10/1724                          | 0.601 (0.314, 1.153)    |
|                                         |                 |        |         | 1 dose          | 1            | prospective   | 7/563                          | 10/1724                          | 2.144 (0.820, 5.605)    |
|                                         |                 |        |         | 2 doses         | 1            | retrospective | 91/26086                       | 44/7690                          | 0.610 (0.426, 0.873)    |
|                                         |                 |        |         | 1 dose          | 1            | retrospective | 7/563                          | 44/7690                          | 2.173 (0.983, 4.802)    |



**eTable 6. Estimated Pooled Vaccine Protection against Severe RVGE Stratified by Income Development at Different Follow-up Times**

| Studies                      | Countries and regions                  | Income | Vaccine(n/N) | Placebo(n/N) | RR (95% CI)          | P      | I <sup>2</sup> |
|------------------------------|----------------------------------------|--------|--------------|--------------|----------------------|--------|----------------|
| <b>RV1</b>                   |                                        |        |              |              |                      |        |                |
| <b>First year follow-up</b>  |                                        |        |              |              |                      |        |                |
| Bernstein DI (1999)          | The USA                                | HIC    | 2/108        | 9/107        | 0.220 (0.049, 0.995) |        |                |
| Phua KB (2012)               | Singapore, Hong Kong, Taiwan           | HIC    | 0/5263       | 15/5256      | 0.032 (0.002, 0.538) |        |                |
| Vesikari T (2007)            | Europe (6)                             | HIC    | 5/2572       | 60/1302      | 0.042 (0.017, 0.105) |        |                |
| Subtotal-HIC                 |                                        |        |              |              | 0.071 (0.021, 0.238) | <0.001 | 45.7%          |
| Li RC (2014)                 | China                                  | UMIC   | 8/1575       | 32/1573      | 0.250 (0.115, 0.540) |        |                |
| Ruiz-Palacios GM (2007)      | Mexico                                 | UMIC   | 0/78         | 7/87         | 0.074 (0.004, 1.279) |        |                |
| Ruiz-Palacios GM (2006)      | Finland, Latin America (11)            | UMIC   | 11/9009      | 71/8858      | 0.152 (0.081, 0.287) |        |                |
| Salinas B (2005)             | Brazil, Mexico, Venezuela              | UMIC   | 5/464        | 34/454       | 0.144 (0.057, 0.365) |        |                |
| Tregnaghi MW (2011)          | Latin America (6)                      | UMIC   | 7/4211       | 19/2099      | 0.184 (0.077, 0.436) |        |                |
| Madhi SA (2010)              | South Africa                           | UMIC   | 9/971        | 32/960       | 0.278 (0.133, 0.579) |        |                |
| Colgate ER (2016)            | Bangladesh                             | LMIC   | 9/292        | 35/301       | 0.265 (0.130, 0.542) |        |                |
| Subtotal-MIC                 |                                        |        |              |              | 0.205 (0.150, 0.278) | <0.001 | 0.0%           |
| Madhi SA (2010)              | Malawi                                 | LIC    | 21/525       | 38/483       | 0.508 (0.303, 0.854) |        |                |
| Subtotal-LIC                 |                                        |        |              |              | 0.508 (0.303, 0.854) | 0.011  | \              |
| Total                        |                                        |        |              |              | 0.186 (0.117, 0.298) | <0.001 | 65.9%          |
| <b>Second year follow-up</b> |                                        |        |              |              |                      |        |                |
| Vesikari T (2007)            | Europe (6)                             | HIC    | 19/2554      | 67/1294      | 0.144 (0.087, 0.238) |        |                |
| Phua KB (2012)               | Singapore, Hong Kong, Taiwan           | HIC    | 2/5221       | 36/5194      | 0.055 (0.013, 0.229) |        |                |
| Subtotal-HIC                 |                                        |        |              |              | 0.111 (0.047, 0.264) | <0.001 | 40.1%          |
| Li RC (2014)                 | China                                  | UMIC   | 13/1500      | 43/1479      | 0.298 (0.161, 0.552) |        |                |
| Linhares AC (2008)           | Latin America (10)                     | UMIC   | 22/7175      | 103/7062     | 0.210 (0.133, 0.333) |        |                |
| Subtotal-MIC                 |                                        |        |              |              | 0.238 (0.165, 0.344) | <0.001 | 0.0%           |
| Cunliffe NA (2011)           | Malawi                                 | LIC    | 18/413       | 17/380       | 0.974 (0.510, 1.863) |        |                |
| Subtotal-LIC                 |                                        |        |              |              | 0.974 (0.510, 1.863) | 0.937  | \              |
| Total                        |                                        |        |              |              | 0.241 (0.115, 0.504) | <0.001 | 85.2%          |
| <b>Two years follow-up</b>   |                                        |        |              |              |                      |        |                |
| Vesikari T (2007)            | Europe (6)                             | HIC    | 24/2572      | 127/1302     | 0.096 (0.062, 0.147) |        |                |
| Phua KB (2009)               | Singapore, Hong Kong, Taiwan           | HIC    | 2/5263       | 51/5256      | 0.039 (0.010, 0.161) |        |                |
| Kawamura N (2011)            | Japan                                  | HIC    | 2/498        | 12/250       | 0.084 (0.019, 0.371) |        |                |
| Subtotal-HIC                 |                                        |        |              |              | 0.088 (0.059, 0.131) | <0.001 | 0.0%           |
| Linhares AC (2008)           | Latin America (10)                     | UMIC   | 32/7205      | 161/7081     | 0.195 (0.134, 0.285) |        |                |
| Li RC (2014)                 | China                                  | UMIC   | 21/1575      | 75/1573      | 0.280 (0.173, 0.451) |        |                |
| Subtotal-MIC                 |                                        |        |              |              | 0.227 (0.160, 0.320) | <0.001 | 25.0%          |
| Cunliffe NA (2011)           | Malawi                                 | LIC    | 38/525       | 53/483       | 0.660 (0.443, 0.982) |        |                |
| Subtotal-LIC                 |                                        |        |              |              | 0.660 (0.443, 0.982) | 0.040  | \              |
| Total                        |                                        |        |              |              | 0.174 (0.083, 0.364) | <0.001 | 90.6%          |
| <b>Three years follow-up</b> |                                        |        |              |              |                      |        |                |
| Phua KB (2012)               | Singapore, Hong Kong, Taiwan           | HIC    | 2/5263       | 64/5256      | 0.031(0.008,0.127)   | <0.001 | \              |
| <b>RV5</b>                   |                                        |        |              |              |                      |        |                |
| <b>First year follow-up</b>  |                                        |        |              |              |                      |        |                |
| Goveia MG (2008)             | The USA, Europe (5), Latin America (5) | HIC    | 1/2535       | 51/2563      | 0.020 (0.003, 0.143) |        |                |
| Block SL (2007)              | The USA, Finland                       | HIC    | 0/651        | 6/661        | 0.078 (0.004, 1.384) |        |                |
| Iwata S (2013)               | Japan                                  | HIC    | 0/380        | 10/381       | 0.048 (0.003, 0.812) |        |                |
| Subtotal-HIC                 |                                        |        |              |              | 0.034 (0.008, 0.141) | <0.001 | 0.0%           |
| Grant LR (2012)              | American Indian tribes                 | UMIC   | 3/295        | 26/288       | 0.113 (0.034, 0.368) |        |                |
| Mo ZJ (2017)                 | China                                  | UMIC   | 11/1930      | 52/1946      | 0.213 (0.112, 0.408) |        |                |
| Zaman K (2010)               | Bangladesh, Vietnam                    | LMIC   | 19/991       | 38/978       | 0.493 (0.287, 0.850) |        |                |
| Armah GE (2010)              | Ghana, Kenya                           | LMIC   | 17/1556      | 54/1562      | 0.316 (0.184, 0.543) |        |                |
| Subtotal-MIC                 |                                        |        |              |              | 0.284 (0.170, 0.475) | <0.001 | 57.3%          |
| Sow SO (2012)                | Mali                                   | LIC    | 4/845        | 4/843        | 0.998 (0.250, 3.976) |        |                |
| Subtotal-LIC                 |                                        |        |              |              | 0.998 (0.250, 3.976) | 0.997  | \              |
| Total                        |                                        |        |              |              | 0.251 (0.124, 0.506) | <0.001 | 69.1%          |
| <b>Second year follow-up</b> |                                        |        |              |              |                      |        |                |
| Vesikari K (2009)            | Europe (5)                             | HIC    | 1/667        | 18/694       | 0.058 (0.008, 0.432) |        |                |
| Subtotal-HIC                 |                                        |        |              |              | 0.058 (0.008, 0.432) | 0.005  | \              |
| Zaman K (2010)               | Bangladesh, Vietnam                    | LMIC   | 19/991       | 33/978       | 0.568 (0.325, 0.992) |        |                |
| Armah GE (2010)              | Ghana, Kenya                           | LMIC   | 14/1528      | 17/1522      | 0.820 (0.406, 1.658) |        |                |
| Subtotal-MIC                 |                                        |        |              |              | 0.655 (0.423, 1.013) | 0.057  | \              |
| Sow SO (2012)                | Mali                                   | LIC    | 43/829       | 53/826       | 0.808 (0.547, 1.195) |        |                |
| Subtotal-LIC                 |                                        |        |              |              | 0.808 (0.547, 1.195) | 0.286  | \              |
| Total                        |                                        |        |              |              | 0.618 (0.360, 1.059) | 0.080  | 60.5%          |
| <b>Two years follow-up</b>   |                                        |        |              |              |                      |        |                |
| Vesikari T (2006)            | The USA, Europe (5), Latin America (5) | HIC    | 3/2207       | 68/2305      | 0.046 (0.015, 0.146) |        |                |
| Subtotal-HIC                 |                                        |        |              |              | 0.046 (0.015, 0.146) | <0.001 | \              |
| Zaman K (2010)               | Bangladesh, Vietnam                    | LMIC   | 38/991       | 71/978       | 0.528 (0.360, 0.775) |        |                |
| Armah GE (2010)              | Ghana, Kenya                           | LMIC   | 31/1534      | 71/1523      | 0.433 (0.286, 0.657) |        |                |
| Subtotal-MIC                 |                                        |        |              |              | 0.482 (0.364, 0.639) | <0.001 | 0.0%           |

|                              |       |      |          |          |                      |        |       |
|------------------------------|-------|------|----------|----------|----------------------|--------|-------|
| Sow SO (2012)                | Mali  | LIC  | 48/823   | 58/825   | 0.830 (0.573, 1.201) |        |       |
| Subtotal-LIC                 |       |      |          |          | 0.830 (0.573, 1.201) | 0.322  | \     |
| Total                        |       |      |          |          | 0.377 (0.186, 0.765) | 0.007  | 88.6% |
| <b>Rotavac</b>               |       |      |          |          |                      |        |       |
| <b>First year follow-up</b>  |       |      |          |          |                      |        |       |
| Bhandari N (2014)            | India | LMIC | 56/4354  | 64/2187  | 0.440 (0.308, 0.627) | <0.001 | \     |
| <b>Second year follow-up</b> |       |      |          |          |                      |        |       |
| Bhandari N (2014)            | India | LMIC | 15/4354  | 12/2187  | 0.628 (0.294, 1.339) | 0.228  | \     |
| <b>Two years follow-up</b>   |       |      |          |          |                      |        |       |
| Bhandari N (2014)            | India | LMIC | 71/4354  | 76/2187  | 0.469 (0.341, 0.646) | <0.001 | \     |
| <b>BRV-PV</b>                |       |      |          |          |                      |        |       |
| <b>First year follow-up</b>  |       |      |          |          |                      |        |       |
| Isanaka S (2017)             | Niger | LIC  | 31/1780  | 87/1728  | 0.346 (0.231, 0.518) |        |       |
| Kulkarni PS (2017)           | India | LMIC | 61/3527  | 94/3498  | 0.644 (0.468, 0.885) |        |       |
| Total                        |       |      |          |          | 0.478 (0.260, 0.879) | 0.017  | 82.1% |
| <b>Second year follow-up</b> |       |      |          |          |                      |        |       |
| Kulkarni PS (2017)           | India | LMIC | 110/3533 | 181/3502 | 0.602 (0.478, 0.760) | <0.001 | \     |
| <b>Two years follow-up</b>   |       |      |          |          |                      |        |       |
| Kulkarni PS (2017)           | India | LMIC | 171/3533 | 275/3502 | 0.616 (0.512, 0.742) | <0.001 | \     |
| <b>LLR</b>                   |       |      |          |          |                      |        |       |
| <b>First year follow-up</b>  |       |      |          |          |                      |        |       |
| Shengli X (2020)             | China | UMIC | 16/4582  | 65/4611  | 0.248 (0.144, 0.427) | <0.001 | \     |
| <b>Second year follow-up</b> |       |      |          |          |                      |        |       |
| Shengli X (2020)             | China | UMIC | 47/4359  | 153/4422 | 0.312 (0.225, 0.431) | <0.001 | \     |
| <b>Two years follow-up</b>   |       |      |          |          |                      |        |       |
| Shengli X (2020)             | China | UMIC | 63/4359  | 215/4422 | 0.297 (0.225, 0.392) | <0.001 | \     |

**Table 7. Estimated Pooled Vaccine Protection against Severe RVGE Stratified by Income Development**

| Studies              | Countries and regions  | Income | Case (Vaccinated/N) | Control (Vaccinated/N) | OR (95% CI)           | P      | I <sup>2</sup> |
|----------------------|------------------------|--------|---------------------|------------------------|-----------------------|--------|----------------|
| <b>RV1</b>           |                        |        |                     |                        |                       |        |                |
| <b>2 doses</b>       |                        |        |                     |                        |                       |        |                |
| Sammy K (2019)       | Kenya                  | LMIC   | 17/30               | 102/125                | 0.295(0.126, 0.691)   |        |                |
| Umid E (2020)        | Uzbekistan             | LMIC   | 18/23               | 400/452                | 0.468(0.167,1.314)    |        |                |
| Cantilloa KC (2014)  | Colombia               | UMIC   | 110/117             | 670/711                | 0.962 (0.421, 2.198)  |        |                |
| Beres LK (2016)      | Zambia                 | LMIC   | 23/34               | 182/270                | 1.011 (0.472, 2.167)  |        |                |
| Gastañaduy PA (2016) | Guatemala              | LMIC   | 64/82               | 288/317                | 0.358 (0.187, 0.684)  |        |                |
| Patel MM (2013)      | Bolivia, South America | LMIC   | 196/281             | 1313/1499              | 0.327(0.243, 0.440)   |        |                |
| Armah G (2016)       | Ghana                  | LMIC   | 12/13               | 426/439                | 0.366 (0.044, 3.031)  |        |                |
| Pringle KD (2016)    | Bolivia                | LMIC   | 181/263             | 250/303                | 0.468 (0.315, 0.695)  |        |                |
| Lopez AL (2018)      | Philippines            | LMIC   | 23/35               | 177/202                | 0.271 (0.120, 0.611)  |        |                |
| Palma O (2010)       | El Salvador            | LMIC   | 121/174             | 468/556                | 0.429 (0.289, 0.637)  |        |                |
| Subtotal-MIC         |                        |        |                     |                        | 0.431 (0.338, 0.551)  | <0.001 | 36.1%          |
| Zeev NB (2015)       | Malawi                 | LIC    | 69/82               | 434/463                | 0.355 (0.176, 0.715)  |        |                |
| Subtotal-LIC         |                        |        |                     |                        | 0.355 (0.176, 0.715)  | 0.004  | \              |
| Total                |                        |        |                     |                        | 0.396 (0.329, 0.478)  | <0.001 | 9.1%           |
| <b>1 dose</b>        |                        |        |                     |                        |                       |        |                |
| Beres LK (2016)      | Zambia                 | LMIC   | 1/12                | 28/116                 | 0.286 (0.035, 2.312)  |        |                |
| Gastañaduy PA (2016) | Guatemala              | LMIC   | 14/32               | 51/80                  | 0.442 (0.192, 1.018)  |        |                |
| Patel MM (2013)      | Bolivia, South America | LMIC   | 92/177              | 338/524                | 0.596 (0.422, 0.841)  |        |                |
| Armah G (2016)       | Ghana                  | LMIC   | 0/1                 | 11/24                  | 0.391 (0.014, 10.565) |        |                |
| Pringle KD (2016)    | Bolivia                | LMIC   | 55/137              | 41/94                  | 0.867 (0.509, 1.476)  |        |                |
| Lopez AL (2018)      | Philippines            | LMIC   | 4/16                | 19/44                  | 0.439 (0.122, 1.576)  |        |                |
| Palma O (2010)       | El Salvador            | LMIC   | 49/102              | 113/201                | 0.720 (0.446, 1.161)  |        |                |
| Subtotal-MIC         |                        |        |                     |                        | 0.640 (0.508, 0.806)  | <0.001 | 0.0%           |
| Zeev NB (2015)       | Malawi                 | LIC    | 11/24               | 43/72                  | 0.571 (0.225, 1.448)  |        |                |
| Subtotal-LIC         |                        |        |                     |                        | 0.571 (0.225, 1.448)  | 0.238  | \              |
| Total                |                        |        |                     |                        | 0.636 (0.508, 0.795)  | <0.001 | 0.0%           |
| <b>RV5</b>           |                        |        |                     |                        |                       |        |                |
| <b>3 doses</b>       |                        |        |                     |                        |                       |        |                |
| Patel M (2009)       | Nicaragua              | LMIC   | 110/146             | 616/717                | 0.501 (0.326, 0.771)  |        |                |
| Mast TC (2011)       | Nicaragua              | LMIC   | 241/300             | 1523/1643              | 0.322 (0.229, 0.452)  |        |                |
| Subtotal-MIC         |                        |        |                     |                        | 0.393 (0.255, 0.606)  | <0.001 | 60.6%          |
| Bonkougou IJO (2017) | Burkina Faso           | LIC    | 101/131             | 331/391                | 0.610 (0.373, 0.998)  |        |                |
| Subtotal-LIC         |                        |        |                     |                        | 0.610 (0.373, 0.998)  | 0.049  | \              |
| Total                |                        |        |                     |                        | 0.448 (0.303, 0.661)  | <0.001 | 61.8%          |
| <b>2 doses</b>       |                        |        |                     |                        |                       |        |                |
| Bonkougou IJO (2017) | Burkina Faso           | LIC    | 14/44               | 41/101                 | 0.683 (0.323, 1.443)  | 0.318  | \              |
| <b>1 dose</b>        |                        |        |                     |                        |                       |        |                |
| Bonkougou IJO (2017) | Burkina Faso           | LIC    | 8/38                | 22/82                  | 0.727 (0.290, 1.825)  | 0.498  | \              |

**Table 8. Estimated Pooled Vaccine Protection against Severe AGE Stratified by Income Development at Different Follow-up Times**

| Studies                      | Countries or regions         | Income | Vaccine(n/N) | Placebo(n/N) | RR (95% CI)          | P      | I <sup>2</sup> |
|------------------------------|------------------------------|--------|--------------|--------------|----------------------|--------|----------------|
| <b>RV1</b>                   |                              |        |              |              |                      |        |                |
| <b>First year follow-up</b>  |                              |        |              |              |                      |        |                |
| Phua KB (2012)               | Singapore, Hong Kong, Taiwan | HIC    | 54/5263      | 80/5256      | 0.674 (0.478, 0.950) |        |                |
| Phua KB (2005)               | Singapore                    | HIC    | 5/639        | 10/642       | 0.502 (0.173, 1.461) |        |                |
| Vesikari T (2007)            | Europe (6)                   | HIC    | 116/2572     | 123/1302     | 0.477 (0.374, 0.610) |        |                |
| Subtotal-HIC                 |                              |        |              |              | 0.545 (0.425, 0.698) | <0.001 | 23.0%          |
| Tregnaghi MW (2011)          | Latin America (6)            | UMIC   | 116/4211     | 78/2099      | 0.741 (0.559, 0.983) |        |                |
| Ruiz-Palacios GM (2006)      | Latin America (11), Finland  | UMIC   | 183/9009     | 300/8858     | 0.600 (0.500, 0.719) |        |                |
| Madhi SA (2010)              | South Africa                 | UMIC   | 69/1944      | 61/960       | 0.559 (0.399, 0.781) |        |                |
| Rojas OL (2007)              | Colombia                     | UMIC   | 0/159        | 6/160        | 0.077 (0.004, 1.363) |        |                |
| Colgate ER (2016)            | Bangladesh                   | LMIC   | 65/292       | 86/301       | 0.779 (0.589, 1.03)  |        |                |
| Subtotal-MIC                 |                              |        |              |              | 0.655 (0.552, 0.777) | <0.001 | 35.1%          |
| Madhi SA (2010)              | Malawi                       | LIC    | 187/1030     | 117/483      | 0.749 (0.611, 0.919) |        |                |
| Subtotal-LIC                 |                              |        |              |              | 0.749 (0.611, 0.919) | 0.006  | \              |
| Total                        |                              |        |              |              | 0.641 (0.558, 0.737) | <0.001 | 42.8%          |
| <b>Second year follow-up</b> |                              |        |              |              |                      |        |                |
| Phua KB (2012)               | Singapore, Hong Kong, Taiwan | HIC    | 87/5221      | 131/5194     | 0.661 (0.505, 0.864) |        |                |
| Vesikari T (2007)            | Europe (6)                   | HIC    | 149/2554     | 153/1294     | 0.493 (0.398, 0.612) |        |                |
| Subtotal-HIC                 |                              |        |              |              | 0.565 (0.424, 0.751) | <0.001 | 64.0%          |
| Cunliffe NA (2011)           | Malawi                       | LIC    | 67/413       | 71/380       | 0.868 (0.641, 1.176) |        |                |
| Subtotal-LIC                 |                              |        |              |              | 0.868 (0.641, 1.176) | 0.361  | \              |
| Total                        |                              |        |              |              | 0.648 (0.468, 0.895) | 0.009  | 78.4%          |
| <b>Two years follow-up</b>   |                              |        |              |              |                      |        |                |
| Phua KB (2009)               | Singapore, Hong Kong, Taiwan | HIC    | 141/5263     | 202/5256     | 0.697 (0.564, 0.861) |        |                |
| Vesikari T (2007)            | Europe (6)                   | HIC    | 256/2572     | 257/1302     | 0.504 (0.430, 0.592) |        |                |
| Subtotal-HIC                 |                              |        |              |              | 0.588 (0.428, 0.809) | 0.001  | 82.7%          |
| Li RC (2014)                 | China                        | UMIC   | 187/1575     | 206/1573     | 0.907 (0.753, 1.091) |        |                |
| Linhares AC (2008)           | Latin America (10)           | UMIC   | 342/7205     | 551/7081     | 0.610 (0.535, 0.695) |        |                |
| Subtotal-MIC                 |                              |        |              |              | 0.739 (0.501, 1.091) | 0.128  | 91.5%          |
| Cunliffe NA (2011)           | Malawi                       | LIC    | 146/525      | 160/483      | 0.840 (0.696, 1.012) |        |                |
| Subtotal-LIC                 |                              |        |              |              | 0.840 (0.696, 1.012) | 0.067  | \              |
| Total                        |                              |        |              |              | 0.693 (0.561, 0.854) | 0.001  | 86.7%          |
| <b>RV5</b>                   |                              |        |              |              |                      |        |                |
| <b>First year follow-up</b>  |                              |        |              |              |                      |        |                |
| Breiman RF (2012)            | Bangladesh, Vietnam          | LMIC   | 46/991       | 62/978       | 0.732 (0.505, 1.061) |        |                |
| Tapia MD (2012)              | Ghana, Kenya                 | LMIC   | 70/1234      | 100/1214     | 0.689 (0.513, 0.915) |        |                |
| Subtotal-MIC                 |                              |        |              |              | 0.705 (0.560, 0.888) | 0.003  | 0.0%           |
| Tapia MD (2012)              | Mali                         | LIC    | 55/823       | 56/814       | 0.971 (0.678, 1.391) |        |                |
| Subtotal-LIC                 |                              |        |              |              | 0.971 (0.678, 1.391) | 0.874  | \              |
| Total                        |                              |        |              |              | 0.776 (0.632, 0.953) | 0.016  | 10.1%          |
| <b>Second year follow-up</b> |                              |        |              |              |                      |        |                |
| Breiman RF (2012)            | Bangladesh, Vietnam          | LMIC   | 26/991       | 34/978       | 0.755 (0.456, 1.248) |        |                |
| Tapia MD (2012)              | Ghana, Kenya                 | LMIC   | 25/817       | 22/794       | 1.104 (0.628, 1.942) |        |                |
| Subtotal-MIC                 |                              |        |              |              | 0.893 (0.614, 1.300) | 0.555  | 0.0%           |
| Tapia MD (2012)              | Mali                         | LIC    | 48/444       | 53/451       | 0.920 (0.637, 1.329) |        |                |
| Subtotal-LIC                 |                              |        |              |              | 0.920 (0.637, 1.329) | 0.657  | \              |
| Total                        |                              |        |              |              | 0.907 (0.697, 1.179) | 0.465  | 0.0%           |
| <b>Two years follow-up</b>   |                              |        |              |              |                      |        |                |
| Zaman K (2010)               | Bangladesh, Vietnam          | LMIC   | 81/991       | 107/978      | 0.747 (0.568, 0.983) |        |                |
| Tapia MD (2012)              | Ghana, Kenya                 | LMIC   | 105/1219     | 130/1197     | 0.793 (0.621, 1.013) |        |                |
| Subtotal-MIC                 |                              |        |              |              | 0.772 (0.643, 0.927) | 0.006  | 0.0%           |
| Tapia MD (2012)              | Mali                         | LIC    | 147/797      | 148/795      | 0.991 (0.806, 1.217) |        |                |
| Subtotal-LIC                 |                              |        |              |              | 0.991 (0.806, 1.217) | 0.930  | \              |
| Total                        |                              |        |              |              | 0.852 (0.714, 1.016) | 0.075  | 38.5%          |
| <b>Rotavac</b>               |                              |        |              |              |                      |        |                |
| <b>First year follow-up</b>  |                              |        |              |              |                      |        |                |
| Bhandari N (2014)            | India                        | LMIC   | 221/4354     | 145/2187     | 0.766 (0.625, 0.938) | 0.010  | \              |
| <b>Second year follow-up</b> |                              |        |              |              |                      |        |                |
| Bhandari N (2014)            | India                        | LMIC   | 87/4354      | 43/2187      | 1.016 (0.708, 1.459) | 0.930  | \              |
| <b>Two years follow-up</b>   |                              |        |              |              |                      |        |                |
| Bhandari N (2014)            | India                        | LMIC   | 308/4354     | 188/2187     | 0.823 (0.692, 0.979) | 0.028  | \              |
| <b>BRV-PV</b>                |                              |        |              |              |                      |        |                |
| <b>First year follow-up</b>  |                              |        |              |              |                      |        |                |
| Kulkarni PS (2017)           | India                        | LMIC   | 364/3527     | 379/3498     | 0.953 (0.831, 1.091) |        |                |
| Isanaka S (2017)             | Niger                        | LIC    | 214/1780     | 229/1728     | 0.907 (0.762, 1.080) |        |                |
| Total                        |                              |        |              |              | 0.935 (0.840, 1.041) | 0.220  | 0.0%           |
| <b>Second year follow-up</b> |                              |        |              |              |                      |        |                |
| Kulkarni PS (2017)           | India                        | LMIC   | 440/3533     | 453/3502     | 0.963 (0.852, 1.088) | 0.544  | \              |
| <b>Two years follow-up</b>   |                              |        |              |              |                      |        |                |
| Kulkarni PS (2017)           | India                        | LMIC   | 804/3533     | 832/3502     | 0.958 (0.880, 1.043) | 0.320  | \              |

**Table 9. Estimated Pooled Vaccine Protection against RVGE Stratified by Income Development at Different Follow-up Times**

| Studies                      | Countries and regions                 | Income | Vaccine(n/N) | Placebo(n/N) | RR (95% CI)          | P      | I <sup>2</sup> |
|------------------------------|---------------------------------------|--------|--------------|--------------|----------------------|--------|----------------|
| <b>RV1</b>                   |                                       |        |              |              |                      |        |                |
| <b>First year follow-up</b>  |                                       |        |              |              |                      |        |                |
| Bernstein DI (1999)          | The USA                               | HIC    | 2/108        | 18/107       | 0.110 (0.026, 0.463) |        |                |
| Vesikari T (2007)            | Europe (6)                            | HIC    | 24/2572      | 94/1302      | 0.129 (0.083, 0.201) |        |                |
| Subtotal-HIC                 |                                       |        |              |              | 0.127 (0.083, 0.195) | <0.001 | 0.0%           |
| Li RC (2014)                 | China                                 | UMIC   | 27/1575      | 90/1573      | 0.300 (0.196, 0.458) |        |                |
| Ruiz-Palacios GM (2007)      | Mexico                                | UMIC   | 3/78         | 12/87        | 0.279 (0.082, 0.952) |        |                |
| Salinas B (2005)             | Brazil, Mexico, Venezuela             | UMIC   | 15/464       | 49/454       | 0.300 (0.170, 0.526) |        |                |
| Justino MC (2012)            | Brazil                                | UMIC   | 2/309        | 5/300        | 0.388 (0.076, 1.986) |        |                |
| Madhi SA (2010)              | South Africa                          | UMIC   | 82/1944      | 113/960      | 0.358 (0.273, 0.471) |        |                |
| Rojas OL (2007)              | Colombia                              | UMIC   | 5/159        | 20/160       | 0.252 (0.097, 0.654) |        |                |
| Colgate ER (2016)            | Bangladesh                            | LMIC   | 49/292       | 103/301      | 0.490 (0.363, 0.662) |        |                |
| Zaman K (2009)               | Bangladesh                            | LMIC   | 3/196        | 4/98         | 0.375 (0.086, 1.643) |        |                |
| Subtotal-MIC                 |                                       |        |              |              | 0.373 (0.316, 0.441) | <0.001 | 0.0%           |
| Madhi SA (2010)              | Malawi                                | LIC    | 85/1030      | 61/483       | 0.653 (0.479, 0.891) |        |                |
| Subtotal-LIC                 |                                       |        |              |              | 0.653 (0.479, 0.891) | 0.007  | \              |
| Total                        |                                       |        |              |              | 0.316 (0.224, 0.448) | <0.001 | 77.2%          |
| <b>Second year follow-up</b> |                                       |        |              |              |                      |        |                |
| Vesikari T (2007)            | Europe (6)                            | HIC    | 61/2554      | 110/1294     | 0.281 (0.207, 0.381) |        |                |
| Subtotal-HIC                 |                                       |        |              |              | 0.281 (0.207, 0.381) | <0.001 | \              |
| Li RC (2014)                 | China                                 | UMIC   | 43/1500      | 78/1479      | 0.544 (0.377, 0.783) |        |                |
| Justino MC (2012)            | Brazil                                | UMIC   | 7/309        | 23/300       | 0.295 (0.129, 0.678) |        |                |
| Subtotal                     |                                       |        |              |              | 0.451 (0.260, 0.783) | 0.005  | 42.4%          |
| Cunliffe NA (2011)           | Malawi                                | LIC    | 28/413       | 20/380       | 1.288 (0.738, 2.248) |        |                |
| Subtotal-LIC                 |                                       |        |              |              | 1.288 (0.738, 2.248) | 0.420  | \              |
| Total                        |                                       |        |              |              | 0.494 (0.255, 0.955) | 0.036  | 87.9%          |
| <b>Two years follow-up</b>   |                                       |        |              |              |                      |        |                |
| Kawamura N (2011)            | Japan                                 | HIC    | 14/498       | 34/250       | 0.207 (0.113, 0.378) |        |                |
| Vesikari T (2007)            | Europe (6)                            | HIC    | 85/2572      | 204/1302     | 0.211 (0.165, 0.269) |        |                |
| Subtotal-HIC                 |                                       |        |              |              | 0.210 (0.168, 0.264) | <0.001 | 0.0%           |
| Justino MC (2012)            | Brazil                                | UMIC   | 9/309        | 28/300       | 0.312 (0.150, 0.650) |        |                |
| Li RC (2014)                 | China                                 | UMIC   | 70/1575      | 167/1573     | 0.419 (0.320, 0.548) |        |                |
| Subtotal-MIC                 |                                       |        |              |              | 0.404 (0.314, 0.521) | <0.001 | 0.0%           |
| Cunliffe NA (2011)           | Malawi                                | LIC    | 73/525       | 83/483       | 0.809 (0.606, 1.081) |        |                |
| Subtotal-LIC                 |                                       |        |              |              | 0.809 (0.606, 1.081) | 0.151  | \              |
| Total                        |                                       |        |              |              | 0.348 (0.196, 0.618) | <0.001 | 92.5%          |
| <b>RV5</b>                   |                                       |        |              |              |                      |        |                |
| <b>First year follow-up</b>  |                                       |        |              |              |                      |        |                |
| Vesikari T (2006)            | The USA, Europe (5), Latin America(5) | HIC    | 82/2207      | 315/2305     | 0.272 (0.215, 0.344) |        |                |
| Block SL (2007)              | The USA, Finland                      | HIC    | 15/651       | 54/661       | 0.282 (0.161, 0.495) |        |                |
| Vesikari T (2006)            | Finland                               | HIC    | 12/237       | 43/264       | 0.311 (0.168, 0.575) |        |                |
| Iwata S (2013)               | Japan                                 | HIC    | 7/380        | 28/381       | 0.251 (0.111, 0.567) |        |                |
| Subtotal-HIC                 |                                       |        |              |              | 0.276 (0.226, 0.336) | <0.001 | 0.0%           |
| Grant LR (2012)              | American Indian tribes                | UMIC   | 16/295       | 63/288       | 0.248 (0.147, 0.419) |        |                |
| Mo ZJ (2017)                 | China                                 | UMIC   | 34/1930      | 109/1946     | 0.315 (0.215, 0.460) |        |                |
| Breiman RF (2012)            | Bangladesh, Vietnam                   | LMIC   | 29/991       | 63/978       | 0.454 (0.295, 0.699) |        |                |
| Tapia MD (2012)              | Ghana, Kenya                          | LMIC   | 37/1556      | 91/1562      | 0.408 (0.280, 0.594) |        |                |
| Subtotal-MIC                 |                                       |        |              |              | 0.356 (0.279, 0.453) | <0.001 | 24.7%          |
| Tapia MD (2012)              | Mali                                  | LIC    | 22/845       | 24/843       | 0.914 (0.517, 1.618) |        |                |
| Subtotal-LIC                 |                                       |        |              |              | 0.914 (0.517, 1.618) | 0.759  | \              |
| Total                        |                                       |        |              |              | 0.364 (0.281, 0.473) | <0.001 | 63.0%          |
| <b>Second year follow-up</b> |                                       |        |              |              |                      |        |                |
| Vesikari K (2009)            | Europe (5)                            | HIC    | 44/649       | 95/601       | 0.497 (0.353, 0.699) |        |                |
| Subtotal-HIC                 |                                       |        |              |              | 0.497 (0.353, 0.699) | <0.001 | \              |
| Breiman RF (2012)            | Bangladesh, Vietnam                   | LMIC   | 36/991       | 47/978       | 0.756 (0.494, 1.156) |        |                |
| Tapia MD (2012)              | Ghana, Kenya                          | LMIC   | 18/1242      | 21/1216      | 0.839 (0.449, 1.567) |        |                |
| Subtotal-MIC                 |                                       |        |              |              | 0.781 (0.550, 1.110) | 0.169  | 0.0%           |
| Tapia MD (2012)              | Mali                                  | LIC    | 129/838      | 158/836      | 0.815 (0.659, 1.007) |        |                |
| Subtotal-LIC                 |                                       |        |              |              | 0.815 (0.659, 1.007) | 0.058  | \              |
| Total                        |                                       |        |              |              | 0.703 (0.541, 0.913) | 0.008  | 51.2%          |
| <b>Two years follow-up</b>   |                                       |        |              |              |                      |        |                |
| Vesikari T (2006)            | The USA, Europe (5), Latin America(5) | HIC    | 118/2207     | 403/2305     | 0.306 (0.251, 0.372) |        |                |
| Subtotal-HIC                 |                                       |        |              |              | 0.306 (0.251, 0.372) | <0.001 | \              |
| Zaman K (2010)               | Bangladesh, Vietnam                   | LMIC   | 65/991       | 109/978      | 0.589 (0.439, 0.790) |        |                |
| Tapia MD (2012)              | Ghana, Kenya                          | LMIC   | 55/1551      | 112/1557     | 0.493 (0.360, 0.675) |        |                |
| Subtotal-MIC                 |                                       |        |              |              | 0.542 (0.437, 0.672) | <0.001 | 0.0%           |
| Tapia MD (2012)              | Mali                                  | LIC    | 151/832      | 182/835      | 0.833 (0.686, 1.010) |        |                |
| Subtotal-LIC                 |                                       |        |              |              | 0.833 (0.686, 1.010) | 0.063  | \              |
| Total                        |                                       |        |              |              | 0.521 (0.316, 0.861) | 0.011  | 94.3%          |
| <b>Rotavac</b>               |                                       |        |              |              |                      |        |                |

|                              |       |      |          |          |                      |        |      |
|------------------------------|-------|------|----------|----------|----------------------|--------|------|
| <b>First year follow-up</b>  |       |      |          |          |                      |        |      |
| Bhandari N (2014)            | India | LMIC | 226/4354 | 171/2187 | 0.664(0.548,0.804)   | <0.001 | \    |
| <b>Second year follow-up</b> |       |      |          |          |                      |        |      |
| Bhandari N(2014)             | India | LMIC | 51/4354  | 30/2187  | 0.854 (0.546, 1.337) | 0.490  | \    |
| <b>Two years follow-up</b>   |       |      |          |          |                      |        |      |
| Bhandari N(2014)             | India | LMIC | 277/4354 | 201/2187 | 0.692 (0.582, 0.824) | <0.001 | \    |
| <hr/>                        |       |      |          |          |                      |        |      |
| <b>BRV-PV</b>                |       |      |          |          |                      |        |      |
| <b>First year follow-up</b>  |       |      |          |          |                      |        |      |
| Kulkarni PS (2017)           | India | LMIC | 144/3527 | 197/3498 | 0.725 (0.588, 0.894) |        |      |
| Isanaka S (2017)             | Niger | LIC  | 121/1780 | 172/1728 | 0.683 (0.546, 0.853) |        |      |
| Subtotal                     |       |      |          |          | 0.705 (0.605, 0.821) | <0.001 | 0.0% |
| <b>Second year follow-up</b> |       |      |          |          |                      |        |      |
| Kulkarni PS (2017)           | India | LMIC | 348/3533 | 417/3502 | 0.827 (0.723, 0.946) | 0.006  | \    |
| <b>Two years follow-up</b>   |       |      |          |          |                      |        |      |
| Kulkarni PS (2017)           | India | LMIC | 492/3533 | 614/3502 | 0.794 (0.712, 0.886) | <0.001 | \    |
| <hr/>                        |       |      |          |          |                      |        |      |
| <b>LLR</b>                   |       |      |          |          |                      |        |      |
| <b>First year follow-up</b>  |       |      |          |          |                      |        |      |
| Shengli X (2020)             | China | UMIC | 125/4582 | 309/4611 | 0.407 (0.332, 0.499) | <0.001 | \    |
| <b>Second year follow-up</b> |       |      |          |          |                      |        |      |
| Shengli X (2020)             | China | UMIC | 216/4359 | 488/4422 | 0.449 (0.385, 0.524) | <0.001 | \    |
| <b>Two years follow-up</b>   |       |      |          |          |                      |        |      |
| Shengli X (2020)             | China | UMIC | 337/4359 | 788/4422 | 0.434 (0.385, 0.489) | <0.001 | \    |

**eTable 10. Estimated Pooled Vaccine Protection against RVGE Hospitalization and ED visits Stratified by Income Development at Different Follow-up Times**

| Studies                      | Countries and regions        | Income | Vaccine(n/N) | Placebo(n/N) | RR (95% CI)            | P      | I <sup>2</sup> |
|------------------------------|------------------------------|--------|--------------|--------------|------------------------|--------|----------------|
| <b>RV1</b>                   |                              |        |              |              |                        |        |                |
| <b>First year follow-up</b>  |                              |        |              |              |                        |        |                |
| Bernstein DI (1999)          | The USA                      | HIC    | 0/108        | 2/107        | 0.198 (0.010, 4.080)   |        |                |
| Phua KB (2012)               | Singapore, Hong Kong, Taiwan | HIC    | 0/5263       | 13/5256      | 0.037 (0.002, 0.622)   |        |                |
| Vesikari T (2007)            | Europe (6)                   | HIC    | 0/2572       | 12/1302      | 0.020 (0.001, 0.342)   |        |                |
| Subtotal-HIC                 |                              |        |              |              | 0.050 (0.009, 0.264)   | <0.001 | 0.0%           |
| Li RC (2014)                 | China                        | UMIC   | 2/1575       | 14/1573      | 0.143 (0.032, 0.627)   |        |                |
| Tregnaghi MW (2011)          | Latin America (6)            | UMIC   | 4/4211       | 17/2099      | 0.117 (0.040, 0.348)   |        |                |
| Ruiz-Palacios GM (2006)      | Latin America (11), Finland  | UMIC   | 9/9009       | 59/8858      | 0.150 (0.074, 0.302)   |        |                |
| Madhi SA (2010)              | South Africa, Malawi         | LMIC   | 14/2974      | 16/1443      | 0.425 (0.208, 0.867)   |        |                |
| Subtotal-MIC                 |                              |        |              |              | 0.197 (0.101, 0.382)   | <0.001 | 51.1%          |
| Total                        |                              |        |              |              | 0.161 (0.083, 0.313)   | <0.001 | 43.6%          |
| <b>Second year follow-up</b> |                              |        |              |              |                        |        |                |
| Vesikari T (2007)            | Europe (6)                   | HIC    | 2/2554       | 13/1294      | 0.078 (0.018, 0.345)   |        |                |
| Phua KB (2012)               | Singapore, Hong Kong, Taiwan | HIC    | 1/5221       | 35/5194      | 0.028 (0.004, 0.207)   |        |                |
| Subtotal-HIC                 |                              |        |              |              | 0.054 (0.016, 0.179)   | <0.001 | 0.0%           |
| Li RC (2014)                 | China                        | UMIC   | 2/1500       | 7/1479       | 0.282 (0.059, 1.354)   | 0.114  | \              |
| Subtotal-MIC                 |                              |        |              |              | 0.282 (0.059, 1.354)   |        |                |
| Total                        |                              |        |              |              | 0.093 (0.025, 0.347)   | <0.001 | 46.2%          |
| <b>Two years follow-up</b>   |                              |        |              |              |                        |        |                |
| Vesikari T (2006)            | Europe (6)                   | HIC    | 2/2572       | 25/1302      | 0.040 (0.010, 0.171)   |        |                |
| Laua YL (2013)               | Hong Kong                    | HIC    | 2/1494       | 23/1499      | 0.087 (0.021, 0.369)   |        |                |
| Kawamura N (2011)            | Japan                        | HIC    | 1/498        | 2/250        | 0.251 (0.023, 2.755)   |        |                |
| Subtotal-HIC                 |                              |        |              |              | 0.074 (0.029, 0.189)   | <0.001 | 0.0%           |
| Li RC (2014)                 | China                        | UMIC   | 4/1575       | 21/1573      | 0.190 (0.065, 0.553)   |        |                |
| Linhares AC (2008)           | Latin America (10)           | UMIC   | 22/7205      | 127/7081     | 0.170 (0.108, 0.267)   |        |                |
| Subtotal-MIC                 |                              |        |              |              | 0.173 (0.114, 0.262)   | <0.001 | 0.0%           |
| Total                        |                              |        |              |              | 0.144 (0.091, 0.228)   | <0.001 | 10.2%          |
| <b>RV5</b>                   |                              |        |              |              |                        |        |                |
| <b>First year follow-up</b>  |                              |        |              |              |                        |        |                |
| Grant LR (2012)              | America Indian tries         | UMIC   | 0/295        | 3/288        | 0.139 (0.007, 2.688)   |        |                |
| Christie C (2012)            | Jamaica                      | UMIC   | 0/752        | 8/746        | 0.058 (0.003, 1.009)   |        |                |
| Subtotal-MIC                 |                              |        |              |              | 0.089 (0.011, 0.691)   | 0.021  | 0.0%           |
| <b>Two years follow-up</b>   |                              |        |              |              |                        |        |                |
| Vesikari T (2007)            | Europe (5)                   | HIC    | 16/14018     | 301/13984    | 0.053 (0.032, 0.088)   |        |                |
| Vesikari T (2007)            | The USA                      | HIC    | 3/12284      | 58/12179     | 0.051 (0.016, 0.164)   |        |                |
| Subtotal-HIC                 |                              |        |              |              | 0.053 (0.033, 0.084)   | <0.001 | 0.0%           |
| Vesikari T (2007)            | Latin America (5)            | UMIC   | 1/2252       | 10/2237      | 0.099 (0.013, 0.775)   |        |                |
| Subtotal-MIC                 |                              |        |              |              | 0.099 (0.013, 0.775)   | 0.028  | \              |
| Total                        |                              |        |              |              | 0.054 (0.034, 0.085)   | <0.001 | 0.0%           |
| <b>Rotavac</b>               |                              |        |              |              |                        |        |                |
| <b>First year follow-up</b>  |                              |        |              |              |                        |        |                |
| Bhandari N (2014)            | India                        | LMIC   | 218/4354     | 161/2187     | 0.680<br>(0.558,0.828) | <0.001 | \              |
| <b>Second year follow-up</b> |                              |        |              |              |                        |        |                |
| Bhandari N (2014)            | India                        | LMIC   | 59/4354      | 40/2187      | 0.741 (0.498, 1.103)   | 0.140  | \              |
| <b>Two years follow-up</b>   |                              |        |              |              |                        |        |                |
| Bhandari N (2014)            | India                        | LMIC   | 277/4364     | 201/2187     | 0.692 (0.582, 0.824)   | <0.001 | \              |
| <b>BRV-PV</b>                |                              |        |              |              |                        |        |                |
| <b>First year follow-up</b>  |                              |        |              |              |                        |        |                |
| Kulkarni PS (2017)           | India                        | LMIC   | 35/3527      | 53/3498      | 0.655 (0.428, 1.001)   | 0.051  | \              |
| <b>Second year follow-up</b> |                              |        |              |              |                        |        |                |
| Kulkarni PS (2017)           | India                        | LMIC   | 60/3527      | 87/3502      | 0.685 (0.494, 0.948)   | 0.023  | \              |
| <b>Two years follow-up</b>   |                              |        |              |              |                        |        |                |
| Kulkarni PS (2017)           | India                        | LMIC   | 95/35a7      | 140/3502     | 0.673 (0.521, 0.869)   | 0.002  | \              |
| <b>LLR</b>                   |                              |        |              |              |                        |        |                |
| <b>First year follow-up</b>  |                              |        |              |              |                        |        |                |
| Shengli X (2020)             | China                        | UMIC   | 9/4582       | 31/4611      | 0.292 (0.139, 0.613)   | 0.001  | \              |
| <b>Second year follow-up</b> |                              |        |              |              |                        |        |                |
| Shengli X (2020)             | China                        | UMIC   | 11/4359      | 48/4422      | 0.232 (0.121, 0.447)   | <0.001 | \              |
| <b>Two years follow-up</b>   |                              |        |              |              |                        |        |                |
| Shengli X (2020)             | China                        | UMIC   | 20/4359      | 78/4422      | 0.260 (0.159, 0.424)   | <0.001 | \              |

**Table 11. Estimated Pooled Vaccine Protection against RVGE Stratified by Income Development**

| Studies             | Countries and regions | Income | Case (Vaccinated/N) | Control (Vaccinated/N) | OR (95% CI)          | P      | I <sup>2</sup> |
|---------------------|-----------------------|--------|---------------------|------------------------|----------------------|--------|----------------|
| <b>RV1</b>          |                       |        |                     |                        |                      |        |                |
| <b>2 doses</b>      |                       |        |                     |                        |                      |        |                |
| Julia EM (2020)     | Australia             | HIC    | 1977/2747           | 24902/27465            | 0.264(0.241,0.290)   |        |                |
| Araki K (2018)      | Japan                 | HIC    | 36/456              | 226/724                | 0.189 (0.130, 0.275) |        |                |
| Castilla J (2012)   | Navarre, Spain        | HIC    | 19/730              | 459/5401               | 0.288 (0.181, 0.458) |        |                |
| Araki K (2018)      | Saga City, Japan      | HIC    | 3/64                | 162/720                | 0.169 (0.052, 0.547) |        |                |
| Subtotal-HIC        |                       |        |                     |                        | 0.251 (0.213, 0.295) | <0.001 | 18.2%          |
| Jemma L (2019)      | Kenya                 | LMIC   | 1126/1516           | 653/826                | 0.765(0.624,0.937)   |        |                |
| Beres LK (2016)     | Zambia                | LMIC   | 52/84               | 182/270                | 0.786 (0.472, 1.307) |        |                |
| Subtotal-MIC        |                       |        |                     |                        | 0.768(0.636,0.927)   | 0.006  | 0.0%           |
| Total               |                       |        |                     |                        | 0.354(0.204,0.613)   | <0.001 | 95.4%          |
| <b>1 dose</b>       |                       |        |                     |                        |                      |        |                |
| Castilla J (2012)   | Navarre, Spain        | HIC    | 2/713               | 77/2019                | 0.181 (0.044, 0.737) |        | \              |
| Julia EM (2020)     | Australia             | HIC    | 184/954             | 1808/4371              | 0.339(0.285,0.402)   |        |                |
| Subtotal-HIC        |                       |        |                     |                        | 0.336(0.283,0.398)   | <0.001 | 0.0%           |
| Beres LK (2016)     | Zambia                | LMIC   | 7/39                | 28/116                 | 0.688 (0.273, 1.728) |        | \              |
| Jemma L (2019)      | Kenya                 | LMIC   | 186/576             | 130/303                | 0.635(0.476,0.845)   |        |                |
| Subtotal-MIC        |                       |        |                     |                        | 0.639(0.486,0.841)   | 0.001  | 0.0%           |
| Total               |                       |        |                     |                        | 0.449(0.271,0.744)   | 0.002  | 81.5%          |
| <b>RV5</b>          |                       |        |                     |                        |                      |        |                |
| <b>3 doses</b>      |                       |        |                     |                        |                      |        |                |
| Araki K (2018)      | Japan                 | HIC    | 27/447              | 179/677                | 0.179 (0.117, 0.274) |        |                |
| Castilla J (2012)   | Navarre, Spain        | HIC    | 15/726              | 390/5332               | 0.267 (0.159, 0.450) |        |                |
| Araki K (2018)      | Saga City, Japan      | HIC    | 0/61                | 91/649                 | 0.050 (0.003, 0.809) |        |                |
| Subtotal-HIC        |                       |        |                     |                        | 0.207 (0.140, 0.304) | <0.001 | 16.2%          |
| Tate JE(2016)       | Rwanda                | LIC    | 5/38                | 49/130                 | 0.250 (0.092, 0.684) |        |                |
| Subtotal-LIC        |                       |        |                     |                        | 0.250 (0.092, 0.684) | 0.007  | \              |
| Total               |                       |        |                     |                        | 0.210 (0.154, 0.286) | <0.001 | 0.0%           |
| <b>2 doses</b>      |                       |        |                     |                        |                      |        |                |
| Tate JE (2016)      | Rwanda                | LIC    | 7/40                | 7/88                   | 2.455 (0.798,7.546)  |        |                |
| Total               |                       |        |                     |                        | 2.455 (0.798,7.546)  | 0.117  | \              |
| <b>1 or 2 doses</b> |                       |        |                     |                        |                      |        |                |
| Tate JE (2016)      | Rwanda                | HIC    | 7/40                | 7/88                   | 2.455 (0.798,7.546)  |        |                |
| Castilla J (2012)   | Navarre, Spain        | HIC    | 9/720               | 168/5110               | 0.371 (0.190, 0.731) |        |                |
| Total               |                       |        |                     |                        | 0.905 (0.140, 5.854) | 0.917  | 87.7%          |
| <b>LLR</b>          |                       |        |                     |                        |                      |        |                |
| <b>2 doses</b>      |                       |        |                     |                        |                      |        |                |
| Fu C (2012)         | Guangzhou, China      | UMIC   | 9/2747              | 19/3020                | 0.519 (0.235, 1.149) | 0.106  | \              |
| <b>1 dose</b>       |                       |        |                     |                        |                      |        |                |
| Fu C (2012)         | Guangzhou, China      | UMIC   | 383/3121            | 587/3588               | 0.715 (0.622, 0.822) | <0.001 | \              |
| <b>≥ 1 dose</b>     |                       |        |                     |                        |                      |        |                |
| Fu C (2012)         | Guangzhou, China      | UMIC   | 392/3130            | 606/3607               | 0.709 (0.618, 0.813) |        |                |
| Zhen SS (2015)      | Hebei, China          | UMIC   | 51/305              | 304/1220               | 0.605 (0.436, 0.839) |        |                |
| Li J (2019)         | Beijing, China        | UMIC   | 60/255              | 196/256                | 0.094 (0.063, 0.142) |        |                |
| Subtotal            |                       |        |                     |                        | 0.348 (0.121, 0.999) | 0.050  | 97.6%          |



**Table 12. Estimated Pooled Vaccine Protection Against RVGE Hospitalization Stratified by Income Development**

| Studies              | Countries and regions  | Income | Case (Vaccinated/N) | Control (Vaccinated/N) | OR (95% CI)          | P      | I <sup>2</sup> |
|----------------------|------------------------|--------|---------------------|------------------------|----------------------|--------|----------------|
| <b>RV1</b>           |                        |        |                     |                        |                      |        |                |
| <b>2 doses</b>       |                        |        |                     |                        |                      |        |                |
| Immergluck LC (2016) | the USA                | HIC    | 16/51               | 48/69                  | 0.200 (0.091, 0.438) |        |                |
| Margaret M (2013)    | the USA                | HIC    | 22/95               | 745/1442               | 0.282 (0.173, 0.459) |        |                |
| Dolla MK (2015)      | Quebec                 | HIC    | 7/31                | 254/316                | 0.071 (0.029, 0.173) |        |                |
| Braeckman T (2012)   | Belgium                | HIC    | 66/145              | 165/182                | 0.086 (0.047, 0.156) |        |                |
| Chang WC (2013)      | Taiwan, China          | HIC    | 3/184               | 275/1623               | 0.081 (0.026, 0.256) |        |                |
| Subtotal-HIC         |                        |        |                     |                        | 0.131 (0.071, 0.242) | <0.001 | 70.3%          |
| Groome MJ (2014)     | South Africa           | UMIC   | 278/414             | 856/1100               | 0.583 (0.454, 0.748) |        |                |
| Ichihara MYT (2014)  | Brazil                 | UMIC   | 115/182             | 1481/1682              | 0.233 (0.167, 0.326) |        |                |
| Justino MCA (2011)   | Brazil                 | UMIC   | 289/436             | 564/690                | 0.439 (0.333, 0.579) |        |                |
| Cantilloa KC (2014)  | Colombia               | UMIC   | 143/156             | 670/711                | 0.673 (0.352, 1.289) |        |                |
| Mokomane M (2017)    | Botswana               | UMIC   | 162/205             | 288/317                | 0.379 (0.228, 0.631) |        |                |
| Snelling TL (2009)   | Indigenous Australia   | UMIC   | 3/14                | 32/57                  | 0.213 (0.054, 0.847) |        |                |
| Beres LK (2016)      | Zambia                 | LMIC   | 8/17                | 182/270                | 0.430 (0.160, 1.152) |        |                |
| Gastañaduy PA (2016) | Guatemala              | LMIC   | 41/125              | 265/483                | 0.402 (0.265, 0.608) |        |                |
| Gastañaduy PA (2016) | Guatemala              | LMIC   | 162/205             | 288/317                | 0.379 (0.228, 0.631) |        |                |
| Patel MM (2013)      | Bolivia, South America | LMIC   | 208/300             | 1367/1561              | 0.321 (0.241, 0.428) |        |                |
| Pringle KD (2016)    | Bolivia                | LMIC   | 203/294             | 298/362                | 0.479 (0.332, 0.691) |        |                |
| Armah G (2016)       | Ghana                  | LMIC   | 196/206             | 426/439                | 0.598 (0.258, 1.388) |        |                |
| Gheorghita S (2016)  | Moldova                | LMIC   | 14/89               | 348/745                | 0.213 (0.118, 0.384) |        |                |
| Lopez AL (2018)      | Philippines            | LMIC   | 78/107              | 177/202                | 0.380 (0.209, 0.691) |        |                |
| Palma O (2010)       | El Salvador            | LMIC   | 152/251             | 617/770                | 0.381 (0.280, 0.519) |        |                |
| Sammy K (2019)       | Kenya                  | LMIC   | 51/84               | 308/377                | 0.346(0.208,0.576)   |        |                |
| Umid E (2020)        | Uzbekistan             | LMIC   | 76/92               | 400/452                | 0.618(0.335,1.138)   |        |                |
| Subtotal-MIC         |                        |        |                     |                        | 0.396(0.338,0.465)   | <0.001 | 52.1%          |
| Zeev NB (2015)       | Malawi                 | LIC    | 81/97               | 520/565                | 0.438 (0.236, 0.812) |        |                |
| Mujuru HA (2018)     | Zimbabwe               | LIC    | 853/888             | 2527/2640              | 1.090 (0.740, 1.605) |        |                |
| Subtotal-LIC         |                        |        |                     |                        | 0.714 (0.292, 1.745) | 0.460  | 83.5%          |
| Total                |                        |        |                     |                        | 0.432(0.343,0.544)   | <0.001 | 66.4%          |
| <b>1 dose</b>        |                        |        |                     |                        |                      |        |                |
| Chang WC (2013)      | Taiwan, China          | HIC    | 0/181               | 10/1358                | 0.354 (0.021, 6.063) |        |                |
| Dolla MK (2015)      | Quebec                 | HIC    | 1/25                | 26/88                  | 0.099 (0.013, 0.773) |        |                |
| Immergluck LC (2016) | the USA                | HIC    | 3/38                | 4/25                   | 0.450 (0.092, 2.210) |        |                |
| Subtotal-HIC         |                        |        |                     |                        | 0.269 (0.085, 0.850) | 0.025  | 0.0%           |
| Snelling TL (2009)   | Indigenous Australia   | UMIC   | 7/18                | 26/51                  | 0.612 (0.205, 1.829) |        |                |
| Groome MJ (2014)     | South Africa           | UMIC   | 126/262             | 334/578                | 0.677 (0.505, 0.907) |        |                |
| Ichihara MYT (2014)  | Brazil                 | UMIC   | 33/100              | 279/480                | 0.355 (0.225, 0.559) |        |                |
| Justino MCA (2011)   | Brazil                 | UMIC   | 77/224              | 118/244                | 0.559 (0.395, 0.812) |        |                |
| Mokomane M (2017)    | Botswana               | UMIC   | 37/80               | 51/80                  | 0.489 (0.260, 0.922) |        |                |
| Beres LK (2016)      | Zambia                 | LMIC   | 1/10                | 28/116                 | 0.349 (0.042, 2.878) |        |                |
| Gastañaduy PA (2016) | Guatemala              | LMIC   | 37/80               | 51/80                  | 0.489 (0.260, 0.922) |        |                |
| Patel MM (2013)      | Bolivia, South America | LMIC   | 100/192             | 357/551                | 0.591 (0.423, 0.824) |        |                |
| Pringle KD (2016)    | Bolivia                | LMIC   | 60/151              | 57/121                 | 0.740 (0.457, 1.200) |        |                |
| Armah G (2016)       | Ghana                  | LMIC   | 1/11                | 11/24                  | 0.118 (0.013, 1.074) |        |                |
| Gheorghita S (2016)  | Moldova                | LMIC   | 4/79                | 51/448                 | 0.415 (0.146, 1.183) |        |                |
| Lopez AL (2018)      | Philippines            | LMIC   | 11/40               | 19/44                  | 0.499 (0.200, 1.246) |        |                |
| Palma O (2010)       | El Salvador            | LMIC   | 72/171              | 199/352                | 0.559 (0.386, 0.809) |        |                |
| Sammy K (2019)       | Kenya                  | LMIC   | 7/40                | 41/110                 | 0.357(0.145,0.880)   |        |                |
| Umid E (2020)        | Uzbekistan             | LMIC   | 10/26               | 47/99                  | 0.691(0.286,1.672)   |        |                |
| Subtotal-MIC         |                        |        |                     |                        | 0.559(0.489,0.640)   | <0.001 | 0.0%           |
| Zeev NB (2015)       | Malawi                 | LIC    | 9/25                | 72/117                 | 0.352 (0.143, 0.863) |        |                |
| Mujuru HA (2018)     | Zimbabwe               | LIC    | 15/50               | 45/158                 | 1.076 (0.536, 2.160) |        |                |
| Subtotal-LIC         |                        |        |                     |                        | 0.638 (0.214, 1.907) | 0.422  | 73.2%          |
| Total                |                        |        |                     |                        | 0.578(0.483,0.690)   | <0.001 | 0.0%           |
| <b>RV5</b>           |                        |        |                     |                        |                      |        |                |
| <b>3 doses</b>       |                        |        |                     |                        |                      |        |                |
| Tate JE (2013)       | the USA                | HIC    | 22/127              | 351/700                | 0.208 (0.129, 0.338) |        |                |
| Donauera S (2013)    | the USA                | HIC    | 2/68                | 371/927                | 0.045 (0.011, 0.187) |        |                |
| Margaret M (2013)    | the USA                | HIC    | 6/79                | 287/748                | 0.132 (0.057, 0.307) |        |                |
| Boom JA (2010)       | the USA                | HIC    | 5/72                | 76/214                 | 0.136 (0.052, 0.351) |        |                |
| Cortese MM (2011)    | the USA                | HIC    | 23/283              | 991/2861               | 0.167 (0.108, 0.257) |        |                |
| Immergluck LC (2016) | the USA                | HIC    | 22/57               | 34/55                  | 0.388 (0.181, 0.832) |        |                |
| Staat MA (2011)      | the USA                | HIC    | 17/167              | 282/745                | 0.186 (0.110, 0.314) |        |                |
| Muhsen K (2018)      | Israel                 | HIC    | 46/72               | 363/425                | 0.302 (0.174, 0.524) |        |                |
| Chang WC (2013)      | Taiwan, China          | HIC    | 0/184               | 172/1520               | 0.021 (0.001, 0.342) |        |                |
| Subtotal-HIC         |                        |        |                     |                        | 0.186 (0.133, 0.260) | <0.001 | 56.9%          |
| Patel M (2009)       | Nicaragua              | LMIC   | 158/209             | 868/1044               | 0.628 (0.441, 0.896) |        |                |
| Mast TC (2011)       | Nicaragua              | LMIC   | 293/357             | 1444/1550              | 0.336 (0.240, 0.470) |        |                |
| Patel M (2012)       | Nicaragua              | LMIC   | 773/849             | 7011/7309              | 0.432 (0.332, 0.562) |        |                |
| Gastañaduy PA (2016) | Guatemala              | LMIC   | 19/103              | 105/323                | 0.470 (0.271, 0.814) |        |                |

|                      |              |      |         |          |                      |                      |        |       |
|----------------------|--------------|------|---------|----------|----------------------|----------------------|--------|-------|
| Subtotal-MIC         |              |      |         |          |                      | 0.450 (0.347, 0.584) | <0.001 | 53.4% |
| Tate JE (2016)       | Rwanda       | LIC  | 3/29    | 36/90    | 0.173 (0.049, 0.615) |                      |        |       |
| Bonkougou IJO (2017) | Burkina Faso | LIC  | 133/172 | 488/582  | 0.657 (0.432, 0.999) |                      |        |       |
| Subtotal-LIC         |              |      |         |          |                      | 0.386 (0.106, 1.410) | 0.150  | 74.5% |
| Total                |              |      |         |          |                      | 0.272 (0.197, 0.376) | <0.001 | 80.8% |
| <b>2 doses</b>       |              |      |         |          |                      |                      |        |       |
| Tate JE (2013)       | the USA      | HIC  | 8/113   | 146/495  | 0.182 (0.087, 0.383) |                      |        |       |
| Margaret M (2013)    | the USA      | HIC  | 2/75    | 9/48     | 0.119 (0.024, 0.577) |                      |        |       |
| Donauera S (2013)    | the USA      | HIC  | 3/69    | 144/700  | 0.176 (0.054, 0.566) |                      |        |       |
| Boom JA (2010)       | the USA      | HIC  | 2/69    | 41/179   | 0.100 (0.024, 0.428) |                      |        |       |
| Cortese MM (2011)    | the USA      | HIC  | 7/160   | 328/2115 | 0.249 (0.116, 0.537) |                      |        |       |
| Immergluck LC (2016) | the USA      | HIC  | 3/38    | 8/29     | 0.225 (0.054, 0.943) |                      |        |       |
| Staat MA (2011)      | the USA      | HIC  | 7/157   | 140/603  | 0.154 (0.071, 0.337) |                      |        |       |
| Subtotal-HIC         |              |      |         |          |                      | 0.179 (0.124, 0.260) | <0.001 | 0.0%  |
| Patel M (2009)       | Nicaragua    | LIMC | 42/93   | 257/433  | 0.564 (0.359, 0.886) |                      |        |       |
| Subtotal-MIC         |              |      |         |          |                      | 0.564 (0.359, 0.886) | 0.013  | \     |
| Bonkougou IJO (2017) | Burkina Faso | LIC  | 22/61   | 56/150   | 0.947 (0.510, 1.758) |                      |        |       |
| Subtotal-LIC         |              |      |         |          |                      | 0.947 (0.510, 1.758) | 0.863  | \     |
| Total                |              |      |         |          |                      | 0.260 (0.149, 0.453) | <0.001 | 73.3% |
| <b>1 dose</b>        |              |      |         |          |                      |                      |        |       |
| Tate JE (2013)       | the USA      | HIC  | 9/114   | 110/459  | 0.272 (0.133, 0.555) |                      |        |       |
| Donauera S (2013)    | the USA      | HIC  | 5/71    | 139/695  | 0.303 (0.120, 0.766) |                      |        |       |
| Boom JA (2010)       | the USA      | HIC  | 5/72    | 59/197   | 0.175 (0.067, 0.455) |                      |        |       |
| Cortese MM (2011)    | the USA      | HIC  | 10/163  | 20/137   | 0.382 (0.172, 0.848) |                      |        |       |
| Immergluck LC (2016) | the USA      | HIC  | 2/37    | 2/23     | 0.600 (0.079, 4.583) |                      |        |       |
| Staat MA (2011)      | the USA      | HIC  | 10/160  | 119/582  | 0.259 (0.133, 0.507) |                      |        |       |
| Subtotal-HIC         |              |      |         |          |                      | 0.281 (0.198, 0.398) | <0.001 | 0.0%  |
| Patel M (2009)       | Nicaragua    | LIMC | 34/85   | 227/403  | 0.517 (0.321, 0.832) |                      |        |       |
| Subtotal-MIC         |              |      |         |          |                      | 0.517 (0.321, 0.832) | 0.007  | \     |
| Bonkougou IJO (2017) | Burkina Faso | LIC  | 9/48    | 29/123   | 0.748 (0.324, 1.726) |                      |        |       |
| Subtotal-LIC         |              |      |         |          |                      | 0.748 (0.324, 1.726) | 0.496  | \     |
| Total                |              |      |         |          |                      | 0.365 (0.264, 0.504) | <0.001 | 25.3% |
| <b>LLR</b>           |              |      |         |          |                      |                      |        |       |
| <b>2 doses</b>       |              |      |         |          |                      |                      |        |       |
| Fua C (2007)         | Guangzhou    | UMIC | 0/748   | 6/652    | 0.066 (0.004, 1.182) |                      | 0.065  | \     |
| <b>1 dose</b>        |              |      |         |          |                      |                      |        |       |
| Fua C (2007)         | Guangzhou    | UMIC | 90/838  | 186/832  | 0.418 (0.318, 0.549) |                      | <0.001 | \     |

**eTable 13. Indirect Comparisons between RV1 and RV5 Stratified by Income Development**

| Outcomes                    | No. of studies (RV1/RV5) | RR or OR (95% CI)     | P-value |
|-----------------------------|--------------------------|-----------------------|---------|
| <b>RCTs</b>                 |                          |                       |         |
| <b>RVGE</b>                 |                          |                       |         |
| HIC                         | 2/4                      | 0.462 (0.290, 0.738)  | 0.001   |
| MIC                         | 8/4                      | 1.048 (0.781, 1.407)  | 0.752   |
| LIC                         | 1/1                      | 0.715 (0.373, 1.368)  | 0.311   |
| Subtotal                    | 10/7                     | 0.865 (0.565, 1.325)  | 0.505   |
| <b>Severe RVGE</b>          |                          |                       |         |
| HIC                         | 3/3                      | 2.067 (0.325, 13.139) | 0.441   |
| MIC                         | 7/4                      | 0.719 (0.397, 1.303)  | 0.277   |
| LIC                         | 1/1                      | 0.510 (0.116, 2.231)  | 0.371   |
| Subtotal                    | 10/6                     | 0.768 (0.335, 1.758)  | 0.532   |
| <b>RVGE</b>                 |                          |                       |         |
| <b>Hospitalization</b>      |                          |                       |         |
| MIC                         | 4/2                      | 2.222 (0.258, 19.158) | 0.468   |
| Subtotal                    | 7/2                      | 1.850 (0.216, 15.864) | 0.575   |
| <b>Severe GE</b>            |                          |                       |         |
| MIC                         | 5/2                      | 0.929 (0.698, 1.238)  | 0.615   |
| Subtotal                    | 7/2                      | 0.832 (0.653, 1.061)  | 0.138   |
| <b>Case-control studies</b> |                          |                       |         |
| <b>RVGE</b>                 |                          |                       |         |
| <b>Hospitalization</b>      |                          |                       |         |
| HIC                         | 5/9                      | 0.696 (0.349, 1.386)  | 0.302   |
| MIC                         | 17/4                     | 0.881 (0.649, 1.195)  | 0.415   |
| LIC                         | 2/2                      | 1.842 (0.388, 8.747)  | 0.442   |
| Subtotal                    | 24/15                    | 1.264 (0.866, 1.844)  | 0.225   |
| <b>Severe RVGE</b>          |                          |                       |         |
| MIC                         | 10/2                     | 1.097 (0.668, 1.800)  | 0.630   |
| LMIC/LIC                    | 10/3                     | 0.885 (0.575, 1.362)  | 0.577   |
| Subtotal                    | 11/3                     | 0.944 (0.603, 1.476)  | 0.799   |

**eTable 14. Indirect Comparisons between Different Vaccines in the Same Region**

| Region        | Income | Study design | Vaccine (No. of studies) | RR or OR (95% CI)     | p-value |
|---------------|--------|--------------|--------------------------|-----------------------|---------|
| The USA       | HIC    | RCT          | RV1/RV5 (1/2)            | 0.894 (0.109, 7.310)  | 0.916   |
|               |        | Case-control | RV1/RV5 (2/7)            | 1.427 (0.853, 2.387)  | 0.716   |
| Japan         | HIC    | RCT          | RV1/RV5 (1/1)            | 0.825 (0.299, 2.275)  | 0.710   |
|               |        | Case-control | RV1/RV5 (2/2)            | 1.076 (0.620, 1.868)  | 0.794   |
| Taiwan, China | HIC    | RCT          | RV1/RV5 (1/1)            | 0.383 (0.189, 77.638) | 0.381   |
| China         | UMIC   | RCT          | RV1/RV5 (1/1)            | 0.953 (0.539, 1.684)  | 0.867   |
| Spain         | HIC    | Case-control | RV1/RV5 (1/1)            | 1.076 (0.535, 2.166)  | 0.837   |
| Bangladesh    | LMIC   | RCT          | RV1/RV5 (1/1)            | 0.482 (0.192, 1.209)  | 0.120   |
| Guatemala     | LMIC   | Case-control | RV1/RV5 (2/1)            | 0.836 (0.442, 1.580)  | 0.581   |
| India         | LMIC   | RCT          | Rotavac/Rotasiil (1/1)   | 0.916 (0.689, 1.217)  | 0.544   |

**eTable 15. Random-effect Model of Strain-specific Rotavirus Vaccine Protection**

|         | SRVGE                |                      | RCTs                 |                      | Case-control studies               |                      | Cohort studies       |
|---------|----------------------|----------------------|----------------------|----------------------|------------------------------------|----------------------|----------------------|
|         |                      |                      | RVGE                 |                      | RVGE Hospitalization and ED visits |                      | RVGE                 |
|         | RV1                  | RV5                  | RV1                  | RV5                  | RV1                                | RV5                  | RV1                  |
| G1P[8]  | 0.248 (0.139, 0.444) | \                    | 0.526 (0.307, 0.899) | \                    | 0.108 (0.057, 0.221)               | 0.156 (0.091, 0.268) | 0.276 (0.096, 0.794) |
| G3P[8]  | 0.211 (0.067, 0.671) | \                    | 0.043 (0.003, 0.736) | \                    | 0.315 (0.202, 0.490)               | \                    | \                    |
| G4P[8]  | 0.405 (0.168, 0.975) | \                    | \                    | \                    | 0.080 (0.013, 0.479)               | \                    | \                    |
| G8P[8]  | \                    | \                    | \                    | \                    | \                                  | \                    | 0.105 (0.024, 0.465) |
| G9P[8]  | 0.151 (0.087, 0.261) | \                    | 0.200 (0.023, 1.708) | \                    | 0.411 (0.230, 0.736)               | 0.262 (0.145, 0.475) | 0.908 (0.477, 1.727) |
| G12P[8] | \                    | \                    | \                    | \                    | \                                  | \                    | 0.441 (0.272, 0.713) |
| G1P[4]  | 0.200 (0.023, 1.708) | \                    | 0.222 (0.048, 1.026) | \                    | \                                  | \                    | \                    |
| G2P[4]  | 0.333 (0.191, 0.581) | \                    | 0.411 (0.289, 0.585) | \                    | 0.289 (0.185, 0.450)               | 0.060 (0.014, 0.252) | 0.490 (0.107, 2.236) |
| G9P[6]  | \                    | \                    | \                    | \                    | 0.163 (0.056, 0.475)               | \                    | \                    |
| G12P[6] | \                    | \                    | \                    | \                    | \                                  | \                    | 0.598 (0.272, 1.316) |
| G1      | 0.157 (0.064, 0.383) | 0.281 (0.060, 1.313) | 0.250 (0.119, 0.527) | 0.253 (0.199, 0.321) | 0.229 (0.120, 0.436)               | 0.243 (0.093, 0.634) | \                    |
| G2      | 0.187 (0.066, 0.533) | 0.627 (0.375, 1.048) | 0.394 (0.206, 0.752) | 0.336 (0.143, 0.790) | 0.336 (0.137, 0.823)               | 0.272 (0.106, 0.694) | \                    |
| G3      | 0.088 (0.032, 0.241) | 0.337 (0.107, 1.058) | 0.136 (0.058, 0.322) | 0.429 (0.072, 2.561) | 0.690 (0.420, 1.136)               | 0.184 (0.096, 0.354) | \                    |
| G4      | 0.046 (0.006, 0.356) | 0.124 (0.033, 0.463) | 0.353 (0.077, 1.619) | 0.428 (0.121, 1.510) | \                                  | 0.056 (0.008, 0.377) | \                    |
| G8      | 0.222 (0.021, 2.373) | 0.125 (0.016, 0.995) | \                    | \                    | \                                  | \                    | \                    |
| G9      | 0.198 (0.126, 0.313) | 0.226 (0.069, 0.739) | 0.296 (0.213, 0.411) | 0.331 (0.203, 0.539) | 1.002 (0.672, 1.494)               | 0.221 (0.096, 0.507) | \                    |
| G12     | 0.474 (0.232, 0.967) | 0.333 (0.014, 8.175) | \                    | \                    | 0.400 (0.107, 1.496)               | 0.234 (0.066, 0.828) | \                    |
| P[4]    | 0.196 (0.023, 1.669) | 0.727 (0.403, 1.313) | 0.251 (0.023, 2.755) | \                    | \                                  | 0.272 (0.166, 0.447) | \                    |
| P[6]    | 0.438 (0.200, 0.959) | 0.509 (0.312, 0.830) | \                    | \                    | 0.747 (0.439, 1.270)               | 0.014 (0.001, 0.297) | \                    |
| P[8]    | 0.295 (0.126, 0.687) | 0.436 (0.248, 0.765) | 0.244 (0.152, 0.393) | 0.309 (0.208, 0.461) | 0.777 (0.513, 1.176)               | 0.385 (0.206, 0.718) | \                    |

**eFigure1. Flow Diagram**

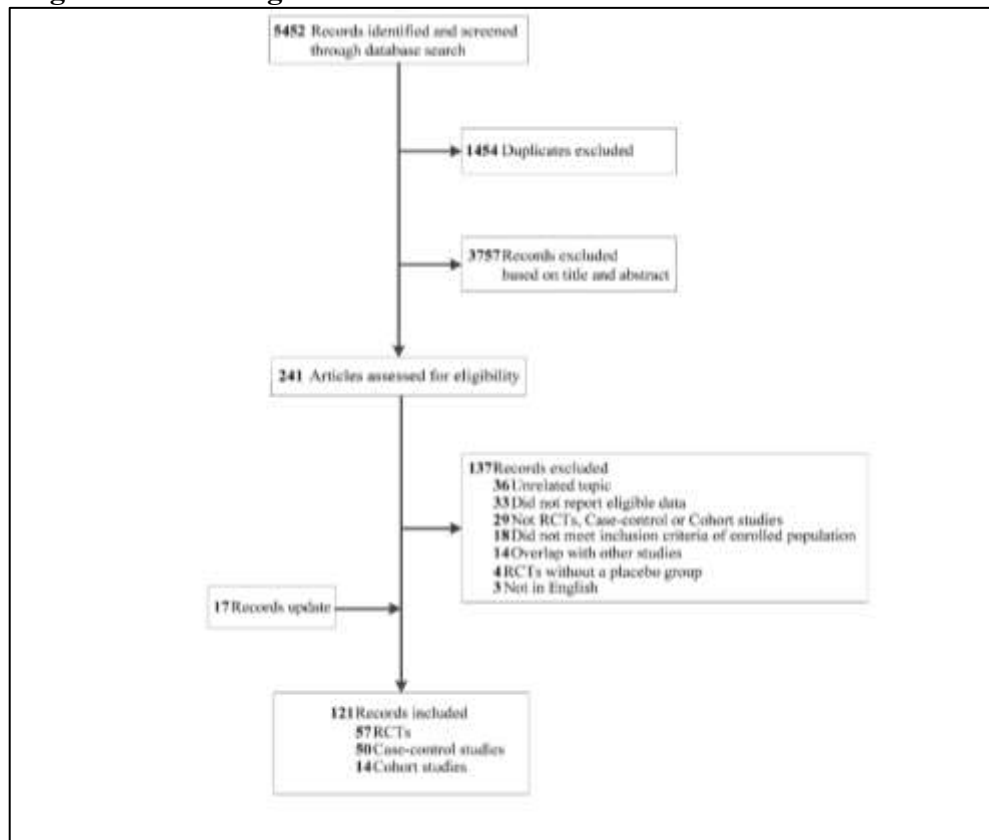

**eFigure 2. The Risk of Serious Adverse Events Between Vaccine and Placebo Groups at Different Follow-up Times**

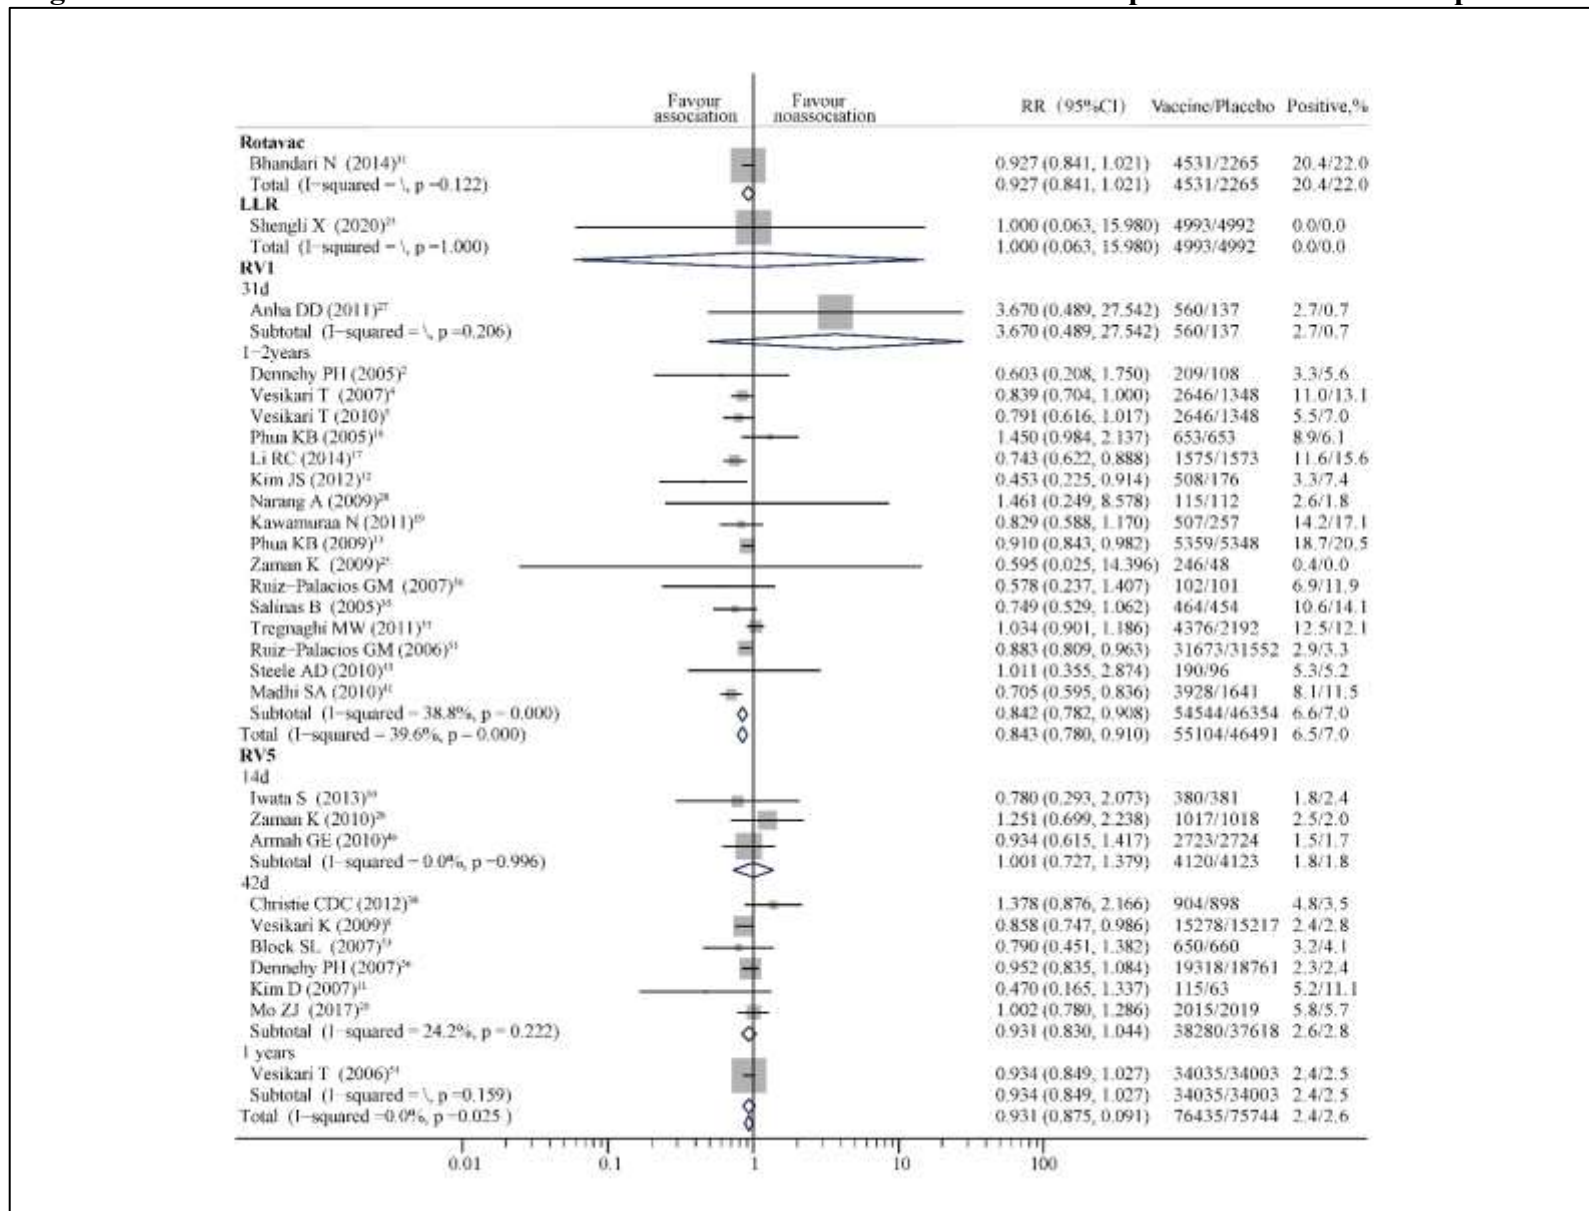

**eFigure 3. The Risk of Intussusception Between Vaccine and Placebo Groups at Different Follow-up Times**

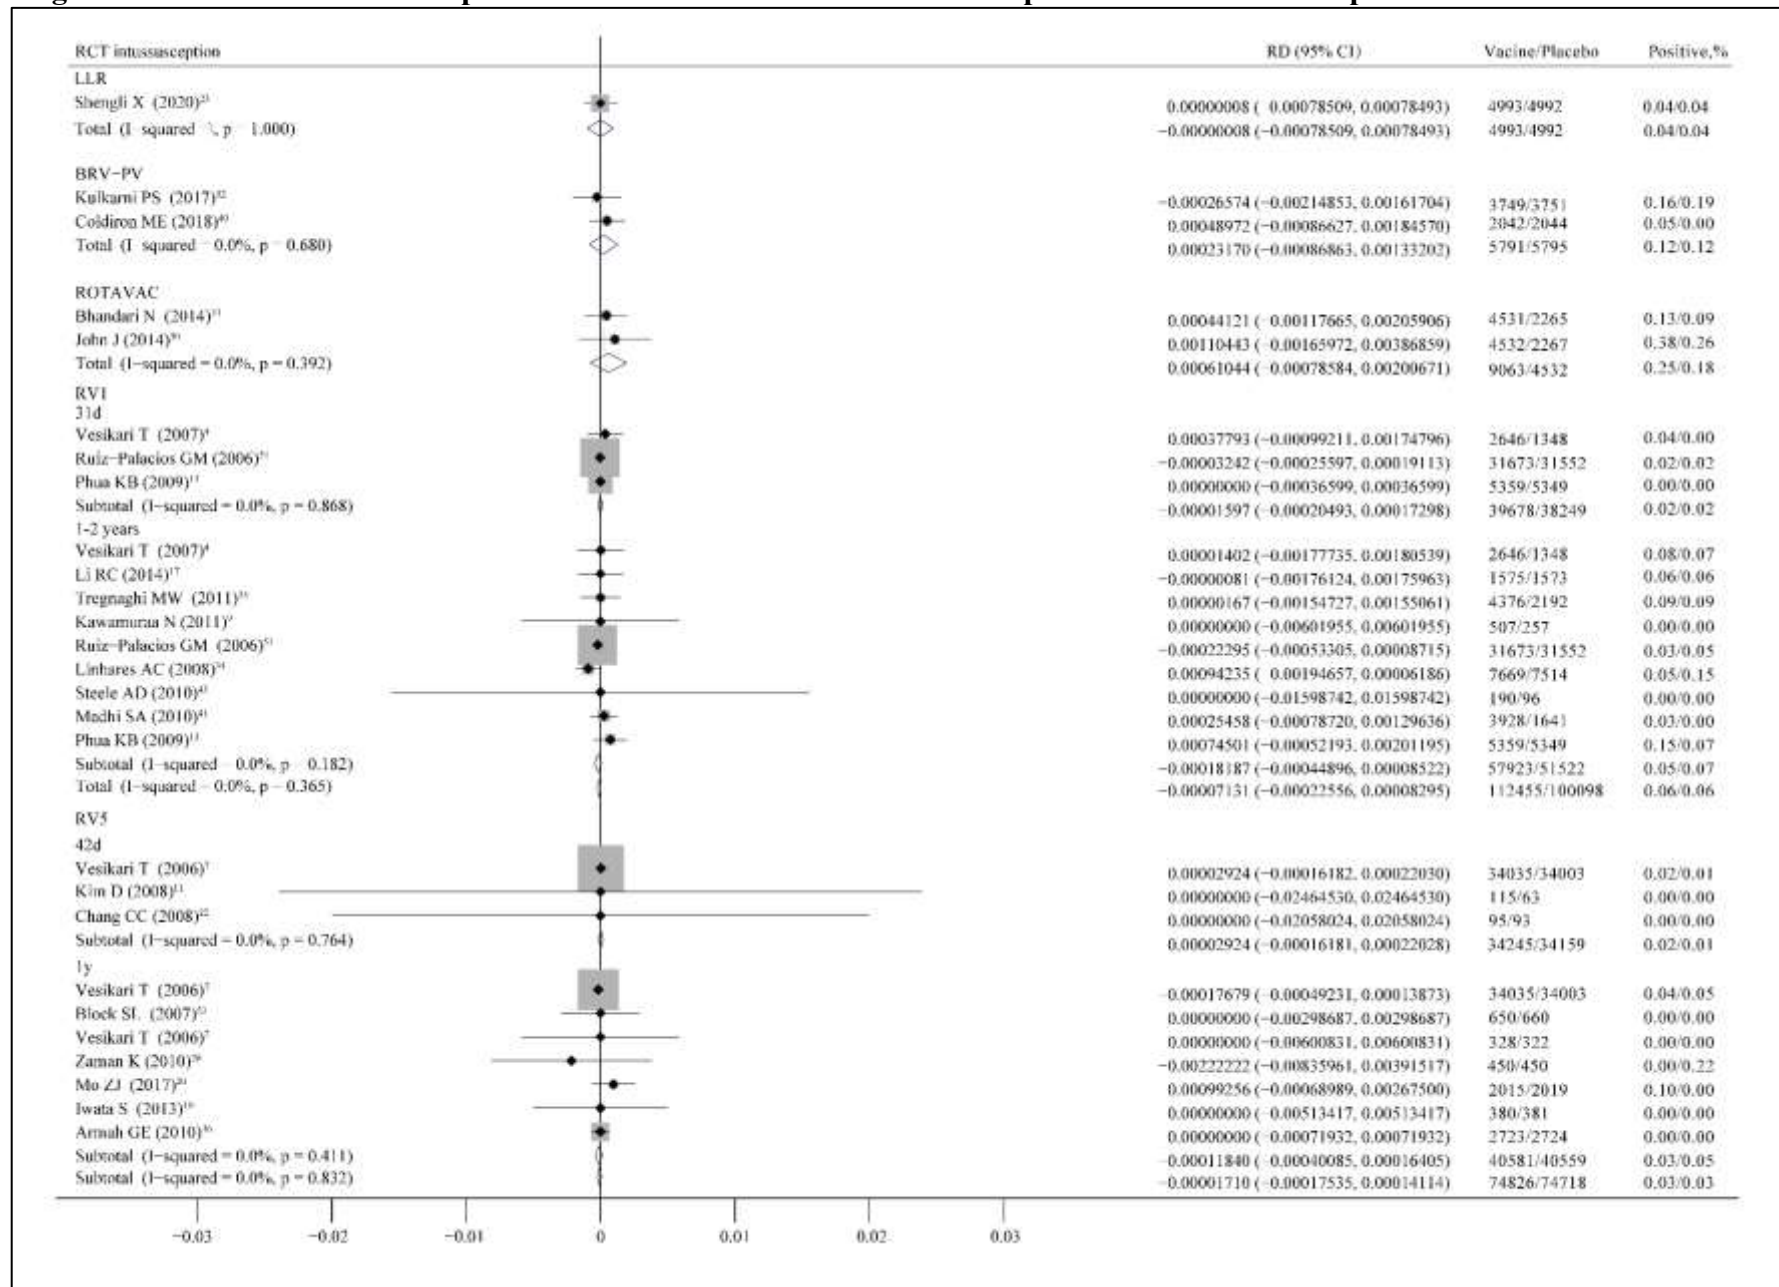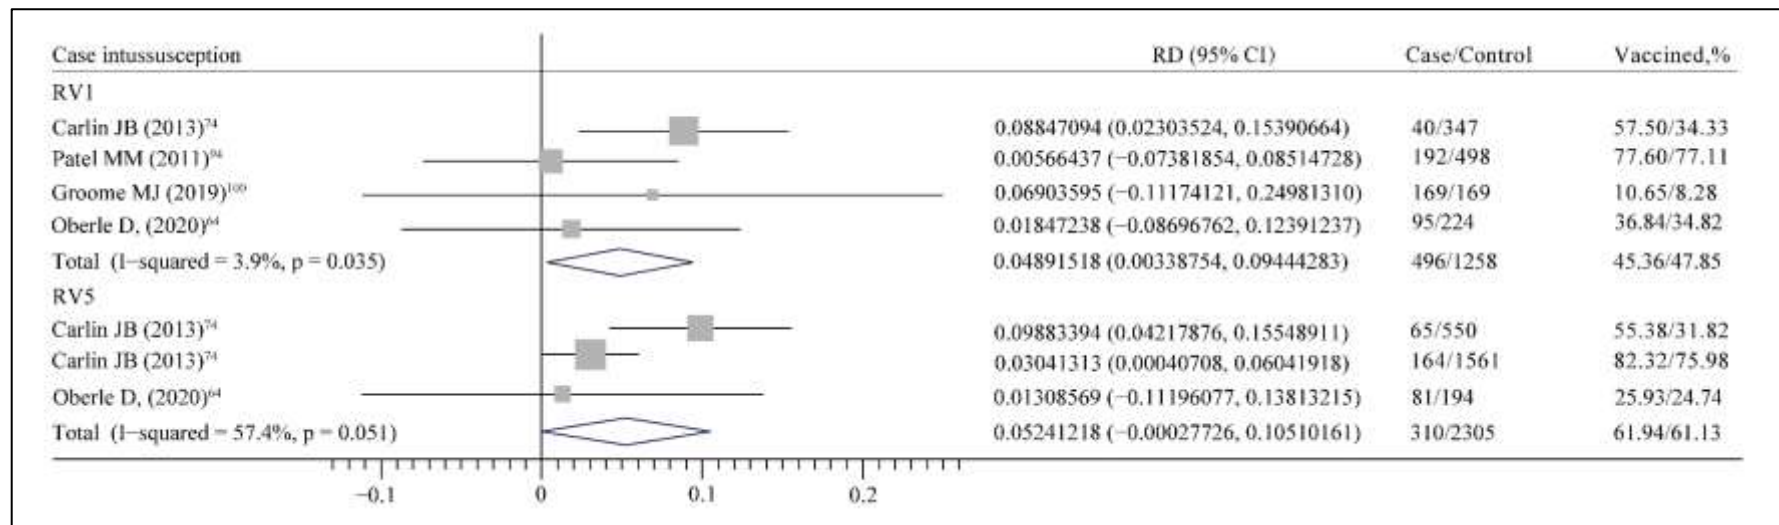

**eFigure 4. All-Cause Mortality in Vaccine and Placebo Groups During the Follow-up Period**

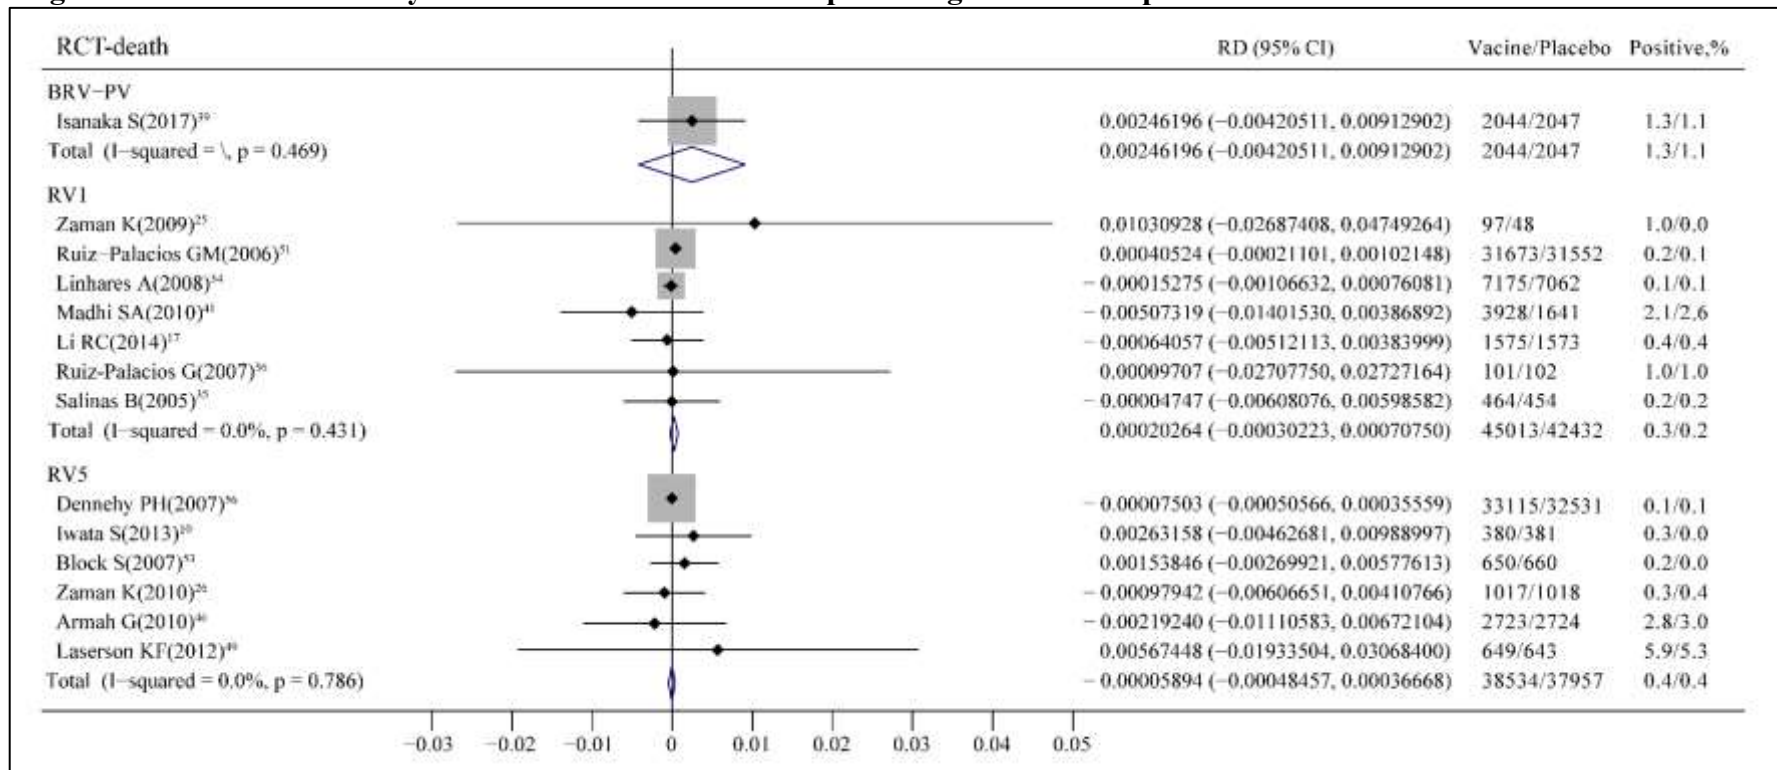



**eFigure 5. Sensitivity Analyses**

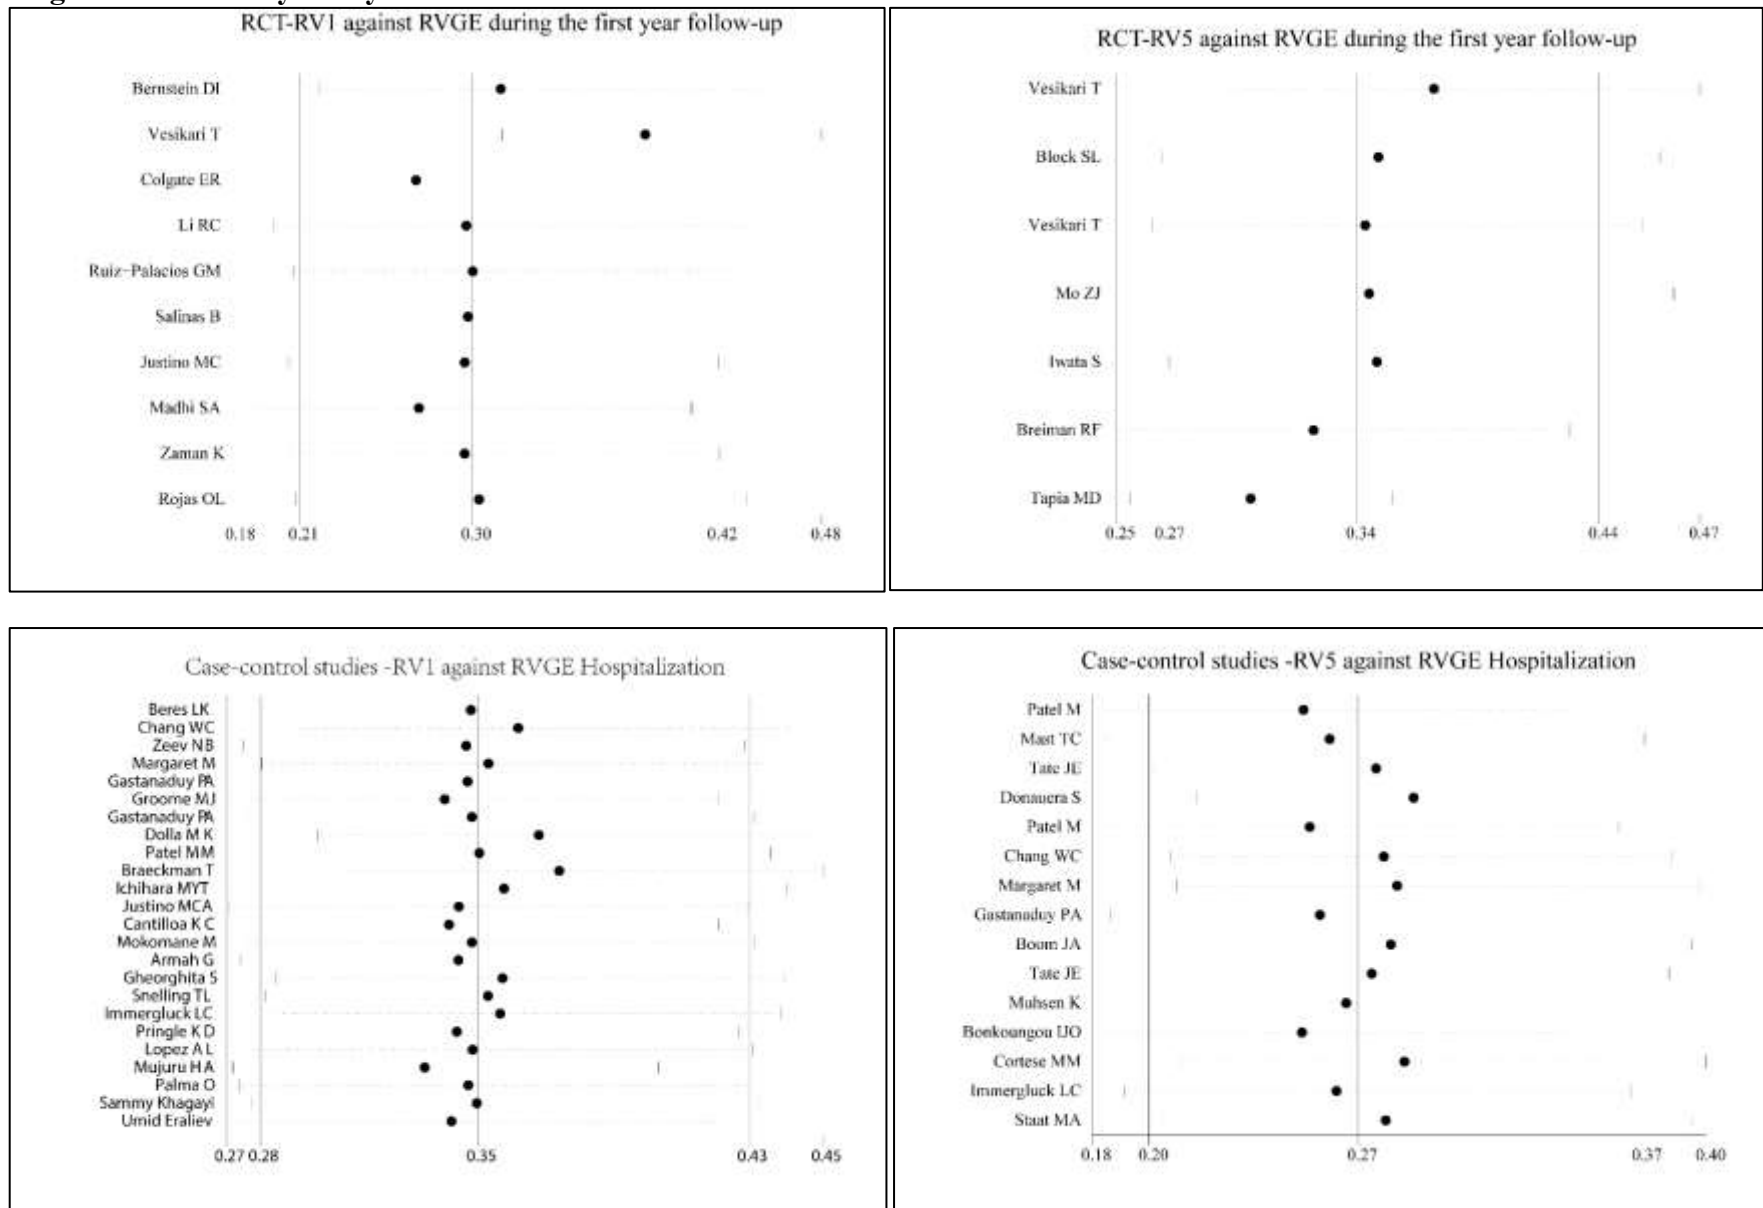

**eFigure 6. Funnel Plots**

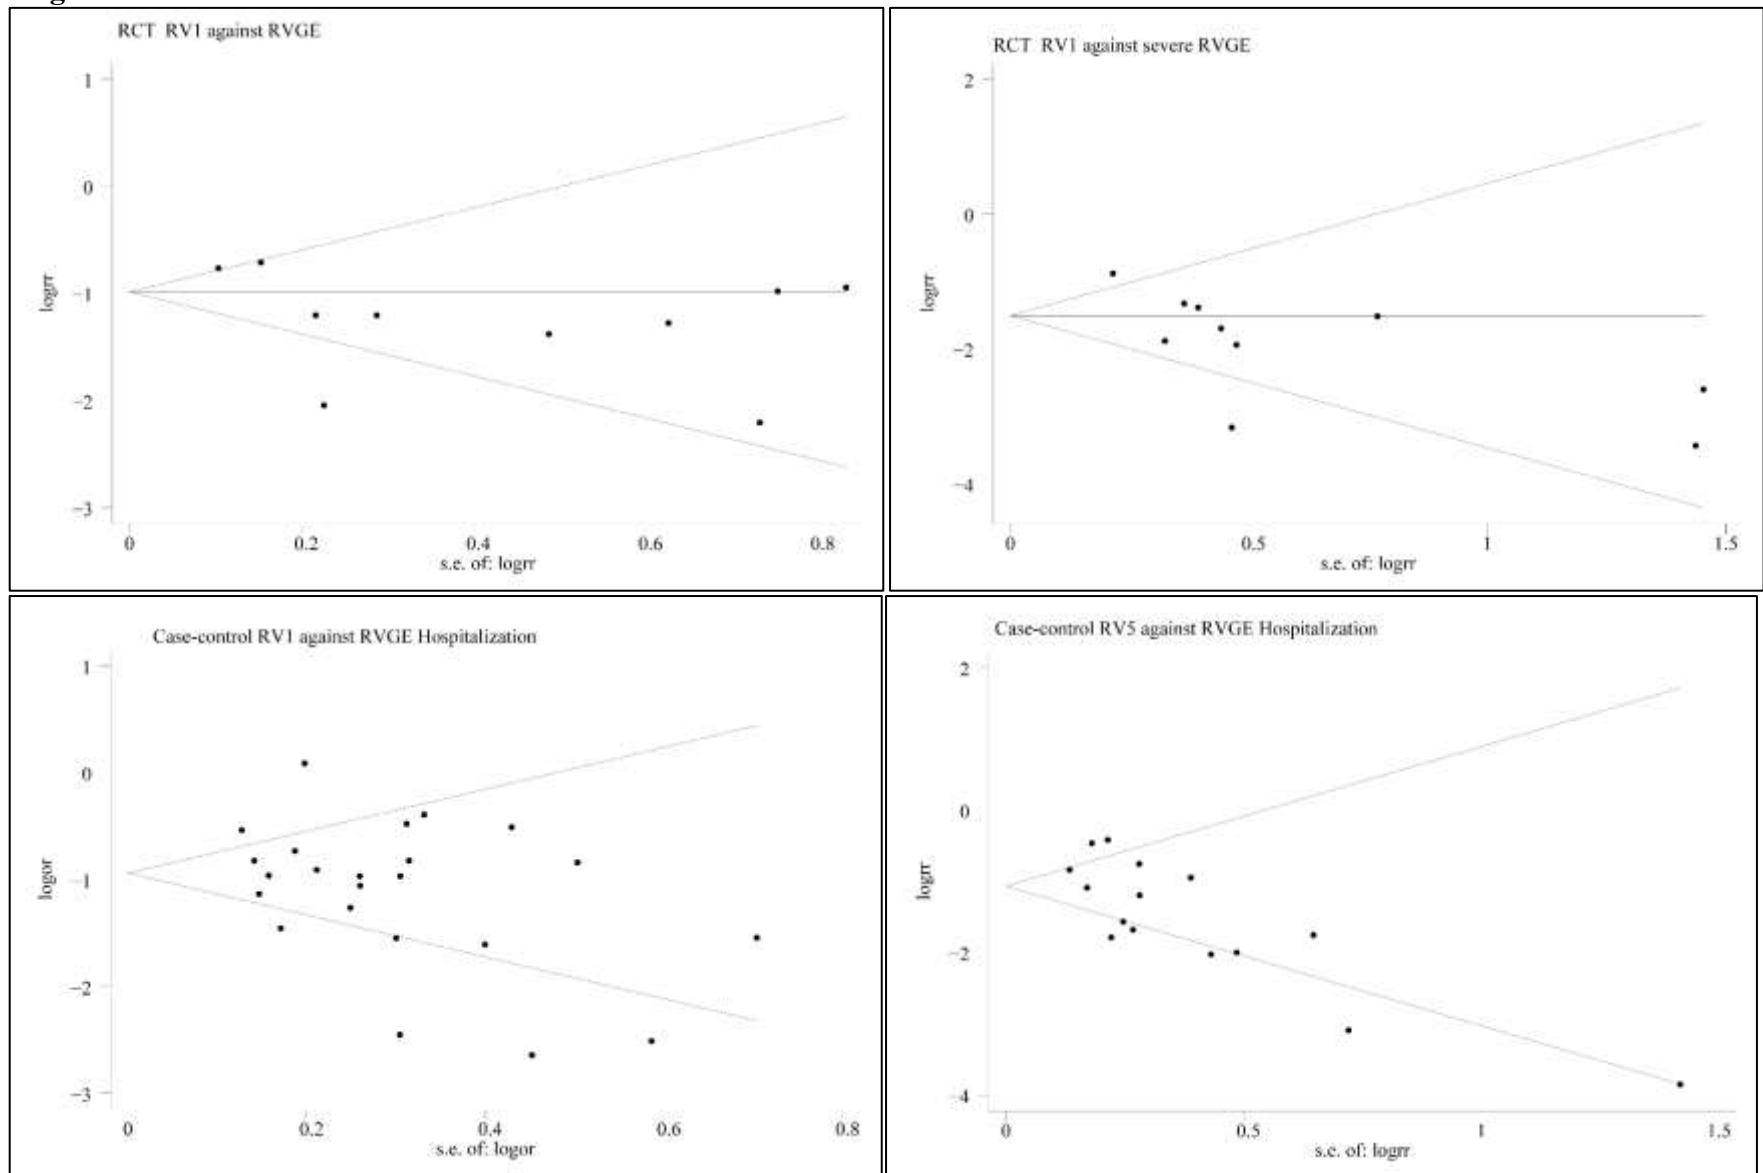

## eReferences

1. Bernstein DI, Sack DA, Rothstein E, et al. Efficacy of live, attenuated, human rotavirus vaccine 89-12 in infants: a randomised placebo-controlled trial. *Lancet* 1999; **354**(9175): 287-90.
2. Dennehy PH, Brady RC, Halperin SA, et al. Comparative evaluation of safety and immunogenicity of two dosages of an oral live attenuated human rotavirus vaccine. *Pediatr Infect Dis J* 2005; **24**(6): 481-8.
3. Grant LR, Watt JP, Weatherholtz RC, et al. Efficacy of a Pentavalent Human-bovine Reassortant Rotavirus Vaccine Against Rotavirus Gastroenteritis Among American Indian Children. *Pediatr Infect Dis J* 2012; **31**(2): 184-8.
4. Vesikari T, Karvonen A, Prymula R, et al. Efficacy of human rotavirus vaccine against rotavirus gastroenteritis during the first 2 years of life in European infants: randomised, double-blind controlled study. *Lancet* 2007; **370**(9601): 1757-63.
5. Vesikari T, Karvonen A, Prymula R, et al. Immunogenicity and safety of the human rotavirus vaccine Rotarix co-administered with routine infant vaccines following the vaccination schedules in Europe. *Vaccine* 2010; **28**(32): 5272-9.
6. Vesikari T, Itzler R, Karvonen A, et al. RotaTeq®, a pentavalent rotavirus vaccine: Efficacy and safety among infants in Europe. *Vaccine* 2009; **28**(2): 345-51.
7. Vesikari T, Karvonen A, Bouckenooghe A, Suryakiran PV, Smolenov I, Han HH. Immunogenicity, reactogenicity and safety of the human rotavirus vaccine RIX4414 oral suspension (liquid formulation) in Finnish infants. *Vaccine* 2011; **29**(11): 2079-84.
8. Vesikari T, Clark HF, Offit PA, et al. Effects of the potency and composition of the multivalent human-bovine (WC3) reassortant rotavirus vaccine on efficacy, safety and immunogenicity in healthy infants. *Vaccine* 2006; **24**(22): 4821-9.
9. Kawamura N, Tokoeda Y, Oshima M, et al. Efficacy, safety and immunogenicity of RIX4414 in Japanese infants during the first two years of life. *Vaccine* 2011; **29**(37): 6335-41.
10. Iwata S, Nakata S, Ukae S, et al. Efficacy and safety of pentavalent rotavirus vaccine in Japan A randomized, double-blind, placebo-controlled, multicenter trial. *Hum Vaccin Immunother* 2013; **9**(8): 1626-33.
11. Kim DS, Lee TJ, Kang JH, et al. Immunogenicity and safety of a pentavalent human-bovine (WC3) reassortant rotavirus vaccine in healthy infants in Korea. *Pediatr Infect Dis J* 2008; **27**(2): 177-8.
12. Kim JS, Bae CW, Lee KY, et al. Immunogenicity, reactogenicity and safety of a human rotavirus vaccine (RIX4414) in Korean infants A randomized, double-blind, placebo-controlled, phase IV study. *Hum Vaccin Immunother* 2012; **8**(6): 806-12.
13. Phua KB, Lim FS, Lau YL, et al. Safety and efficacy of human rotavirus vaccine during the first 2 years of life in Asian infants: Randomised, double-blind, controlled study. *Vaccine* 2009; **27**(43): 5936-41.
14. Phua KB, Lim FS, Lau YL, et al. Rotavirus vaccine RIX4414 efficacy sustained during the third year of life: A randomized clinical trial in an Asian population. *Vaccine* 2012; **30**(30): 4552-7.
15. Phua KB, Lim FS, Quak SH, et al. Efficacy, immunogenicity and safety of a Human Rotavirus Vaccine RIX4414 in Singaporean Infants. *Annals of the Academy of Medicine, Singapore* 2016; **45**(2): 44-50.
16. Phua KB, Quak SH, Lee BW, et al. Evaluation of RIX4414, a live, attenuated rotavirus vaccine, in a randomized, double-blind, placebo-controlled phase 2 trial involving 2464 Singaporean infants. *J Infect Dis* 2005; **192** Suppl 1: S6-S16.
17. Li R-c, Huang T, Li Y, et al. Human rotavirus vaccine (RIX4414) efficacy in the first two years of life A randomized, placebo-controlled trial in China. *Hum Vaccin Immunother* 2014; **10**(1): 11-8.
18. Li R-c, Huang T, Li Y, et al. Immunogenicity and reactogenicity of the human rotavirus vaccine, RIX4414 oral suspension, when co-administered with routine childhood vaccines in Chinese infants. *Hum Vaccin Immunother* 2016; **12**(3): 785-93.
19. Lau Y-L, Nelson EAS, Poon K-H, et al. Efficacy, safety and immunogenicity of a human rotavirus vaccine (RIX4414) in Hong Kong children up to three years of age: A randomized, controlled trial. *Vaccine* 2013; **31**(18): 2253-9.
20. Mo Z, Mo Y, Li M, et al. Efficacy and safety of a pentavalent live human-bovine reassortant rotavirus vaccine (RV5) in healthy Chinese infants: A randomized, double-blind, placebo-controlled trial. *Vaccine* 2017; **35**(43): 5897-904.
21. Mo Z, Ma X, Luo P, et al. Immunogenicity of pentavalent rotavirus vaccine in Chinese infants. *Vaccine* 2019; **37**(13): 1836-43.
22. Chang CC, Chang MH, Lin TY, Lee HC, Hsieh WS, Lee PI. Experience of pentavalent human-bovine reassortant rotavirus vaccine among healthy infants in Taiwan. *Journal of the Formosan Medical Association = Taiwan yi zhi* 2009; **108**(4): 280-5.
23. Xia S, Du J, Su J, et al. Efficacy, immunogenicity and safety of a trivalent live human-lamb reassortant rotavirus vaccine (LLR3) in healthy Chinese infants: A randomized, double-blind, placebo-controlled trial. *Vaccine* 2020; **S0264-410X**(20): 30531-4.
24. Colgate ER, Haque R, Dickson DM, et al. Delayed Dosing of Oral Rotavirus Vaccine Demonstrates Decreased Risk of Rotavirus Gastroenteritis Associated With Serum Zinc: A Randomized Controlled Trial. *Clinical infectious diseases : an official publication of the Infectious Diseases Society of America* 2016; **63**(5): 634-41.
25. Zaman K, Sack DA, Yunus M, et al. Successful co-administration of a human rotavirus and oral poliovirus vaccines in Bangladeshi infants in a 2-dose schedule at 12 and 16 weeks of age. *Vaccine* 2009; **27**(9): 1333-9.
26. Zaman K, Dang DA, Victor JC, et al. Efficacy of pentavalent rotavirus vaccine against severe rotavirus gastroenteritis in infants in developing countries in Asia: a randomised, double-blind, placebo-controlled trial. *Lancet* 2010; **376**(9741): 615-23.
27. Anh DD, Carlos CC, Thiem DV, et al. Immunogenicity, reactogenicity and safety of the human rotavirus vaccine RIX4414 (Rotarix™) oral suspension (liquid formulation) when co-administered with expanded program on immunization (EPI) vaccines in Vietnam and the Philippines in 2006-2007. *Vaccine* 2011; **29**(11): 2029-36.
28. Narang A, Bose A, Pandit AN, et al. Immunogenicity, reactogenicity and safety of human rotavirus vaccine (RIX4414) in Indian infants. *Hum Vaccin* 2009; **5**(6): 414-9.
29. Bhandari N, Sharma P, Taneja S, et al. A Dose-Escalation Safety and Immunogenicity Study of Live Attenuated Oral Rotavirus Vaccine 116E in Infants: A Randomized, Double-Blind, Placebo-Controlled Trial. *J Infect Dis* 2009; **200**(3): 421-9.
30. John J, Kawade A, Rongsen-Chandola T, et al. Active surveillance for intussusception in a phase III efficacy trial of an oral monovalent rotavirus vaccine in India. *Vaccine* 2014; **32** Suppl 1: A104-A9.
31. Bhandari N, Rongsen-Chandola T, Bavdekar A, et al. Efficacy of a monovalent human-bovine (116E) rotavirus vaccine in Indian infants: A randomised, double-blind, placebo-controlled trial. *Lancet* 2014; **383**(9935): 2136-43.
32. Kulkarni PS, Desai S, Tewari T, et al. A randomized Phase III clinical trial to assess the efficacy of a bovine-human reassortant pentavalent rotavirus vaccine in Indian infants. *Vaccine* 2017; **35**(45): 6228-37.
33. Tregnaighi MW, Abate HJ, Valencia A, et al. Human Rotavirus Vaccine Is Highly Efficacious When Coadministered With Routine Expanded Program of Immunization Vaccines Including Oral Poliovirus Vaccine in Latin America. *Pediatr Infect Dis J* 2011; **30**(6): E103-E8.
34. Linhares AC, Velazquez FR, Perez-Schael I, et al. Efficacy and safety of an oral live attenuated human rotavirus vaccine against rotavirus gastroenteritis during the first 2 years of life in Latin American infants: a randomised, double-blind, placebo-controlled phase III study. *Lancet* 2008; **371**(9619): 1181-9.
35. Salinas B, Schael IP, Linhares AC, et al. Evaluation of safety, immunogenicity and efficacy of an attenuated rotavirus vaccine, RIX4414: A randomized, placebo-controlled trial in Latin American infants. *Pediatr Infect Dis J* 2005; **24**(9): 807-16.
36. Ruiz-Palacios GM, Guerrero ML, Bautista-Marquez A, et al. Dose response and efficacy of a live, attenuated human rotavirus vaccine in Mexican infants. *Pediatrics* 2007; **120**(2): E253-E61.
37. Justino MCA, Araujo EC, van Doorn L-J, et al. Oral live attenuated human rotavirus vaccine (Rotarix (TM)) offers sustained high protection against severe G9P[8] rotavirus gastroenteritis during the first two years of life in Brazilian children. *Memorias Do Instituto Oswaldo Cruz* 2012; **107**(7): 846-53.
38. Christie CDC, Duncan ND, Thame KA, et al. Pentavalent rotavirus vaccine in developing countries: Safety and health care resource utilization. *Pediatrics* 2010; **126**(6): e1499-e506.
39. Isanaka S, Guindo O, Langendorf C, et al. Efficacy of a Low-Cost, Heat-Stable Oral Rotavirus Vaccine in Niger. *The New England journal of medicine* 2017; **376**(12): 1121-30.
40. Coldiron ME, Guindo O, Makarimi R, et al. Safety of a heat-stable rotavirus vaccine among children in Niger: Data from a phase 3, randomized, double-blind, placebo-controlled trial. *Vaccine* 2018; **36**(25): 3674-80.
41. Madhi SA, Cunliffe NA, Steele D, et al. Effect of Human Rotavirus Vaccine on Severe Diarrhea in African Infants. *The New England journal of medicine* 2010; **362**(4): 289-98.
42. Steele AD, Neuzil KM, Cunliffe NA, et al. Human rotavirus vaccine Rotarix™ provides protection against diverse circulating rotavirus strains in African infants: a randomized controlled trial. *BMC Infect Dis* 2012; **12**: 213.
43. Steele AD, Reynders J, Scholtz F, et al. Comparison of 2 Different Regimens for Reactogenicity, Safety, and Immunogenicity of the Live Attenuated Oral Rotavirus Vaccine RIX4414 Coadministered with Oral Polio Vaccine in South African Infants. *J Infect Dis* 2010; **202** Suppl: S93-S100.
44. Cunliffe NA, Witte D, Ngwira BM, et al. Efficacy of human rotavirus vaccine against severe gastroenteritis in Malawian children in the first two years of life: A randomized, double-blind, placebo controlled trial. *Vaccine* 2012; **30** Suppl 1: A36-A43.
45. Rojas OL, Caicedo L, Guzmán C, et al. Evaluation of circulating intestinally committed memory B cells in children vaccinated with attenuated human rotavirus vaccine. *Viral Immunol* 2007; **20**(2): 300-11.

46. Armah GE, Sow SO, Breiman RF, et al. Efficacy of pentavalent rotavirus vaccine against severe rotavirus gastroenteritis in infants in developing countries in sub-Saharan Africa: a randomised, double-blind, placebo-controlled trial. *Lancet* 2010; **376**(9741): 606-14.
47. Tapia MD, Armah G, Breiman RF, et al. Secondary efficacy endpoints of the pentavalent rotavirus vaccine against gastroenteritis in sub-Saharan Africa. *Vaccine* 2012; **30 Suppl 1**: A79-A85.
48. Sow SO, Tapia M, Haidara FC, et al. Efficacy of the oral pentavalent rotavirus vaccine in Mali. *Vaccine* 2012; **30 Suppl 1**: A71-A8.
49. Laserson KF, Nyakundi D, Feikin DR, et al. Safety of the pentavalent rotavirus vaccine (PRV), RotaTeq (R), in Kenya, including among HIV-infected and HIV-exposed infants. *Vaccine* 2012; **30 Suppl 1**: A61-A70.
50. Georges-Courbot MC, Monges J, Siopathis MR, et al. Evaluation of the efficacy of a low-passage bovine rotavirus (strain WC3) vaccine in children in Central Africa. *Res Virol* 1991; **142**(5): 405-11.
51. Ruiz-Palacios GM, Pérez-Schael I, Velázquez FR, et al. Safety and efficacy of an attenuated vaccine against severe rotavirus gastroenteritis. *The New England journal of medicine* 2006; **354**(1): 11-22.
52. Breiman RF, Zaman K, Armah G, et al. Analyses of health outcomes from the 5 sites participating in the Africa and Asia clinical efficacy trials of the oral pentavalent rotavirus vaccine. *Vaccine* 2012; **30 Suppl 1**: A24-A9.
53. Block SL, Vesikari T, Goveia MG, et al. Efficacy, immunogenicity, and safety of a pentavalent human-bovine (WC3) reassortant rotavirus vaccine at the end of shelf life. *Pediatrics* 2007; **119**(1): 11-8.
54. Vesikari T, Matson DO, Dennehy P, et al. Safety and efficacy of a pentavalent human-bovine (WC3) reassortant rotavirus vaccine. *The New England journal of medicine* 2006; **354**(1): 23-33.
55. Goveia MG, DiNubile Mj Fau - Dallas MJ, Dallas Mj Fau - Heaton PM, Heaton Pm Fau - Kuter BJ, Kuter BJ. Efficacy of pentavalent human-bovine (WC3) reassortant rotavirus vaccine based on breastfeeding frequency. *Pediatr Infect Dis J* 2008; **27**(7): 656-8.
56. Dennehy PH, Goveia MG, Dallas MJ, Heaton PM. The integrated phase III safety profile of the pentavalent human-bovine (WC3) reassortant rotavirus vaccine. *International Journal of Infectious Diseases* 2007; **11 Suppl 2**: S36-S42.
57. Vesikari T, Itzler R, Matson DO, et al. Efficacy of a pentavalent rotavirus vaccine in reducing rotavirus-associated health care utilization across three regions (11 countries). *International journal of infectious diseases : IJID : official publication of the International Society for Infectious Diseases* 2007; **11 Suppl 2**: S29-S35.
58. Cortese MM, Immergluck LC, Held M, et al. Effectiveness of monovalent and pentavalent rotavirus vaccine. *Pediatrics* 2013; **132**(1): e25-33.
59. Immergluck LC, Parker TC, Jain S, et al. Sustained effectiveness of monovalent and pentavalent rotavirus vaccines in children. *The Journal of pediatrics* 2016; **172**: 116-20.
60. Staat MA, Payne DC, Donauer S, et al. Effectiveness of pentavalent rotavirus vaccine against severe disease. *Pediatrics* 2011; **128**(2): e267-75.
61. Tate JE, Mijatovic-Rustempasic S, Tam KI, et al. Comparison of 2 assays for diagnosing rotavirus and evaluating vaccine effectiveness in children with gastroenteritis. *Emerg Infect Dis* 2013; **19**(8): 1245-52.
62. Donauer S, Payne DC, Edwards KM, et al. Determining the effectiveness of the pentavalent rotavirus vaccine against rotavirus hospitalizations and emergency department visits using two study designs. *Vaccine* 2013; **31**(24): 2692-7.
63. Boom JA, Tate JE, Sahni LC, et al. Effectiveness of pentavalent rotavirus vaccine in a large urban population in the United States. *Pediatrics* 2010; **125**(2): e199-e207.
64. Cortese MM, LeBlanc J, White KE, et al. Leveraging state immunization information systems to measure the effectiveness of rotavirus vaccine. *Pediatrics* 2011; **128**(6): e1474-e81.
65. Doll MK, Buckeridge DL, Morrison KT, et al. Effectiveness of monovalent rotavirus vaccine in a high-income, predominant-use setting. *Vaccine* 2015; **33**(51): 7307-14.
66. de Palma O, Cruz L, Ramos H, et al. Effectiveness of rotavirus vaccination against childhood diarrhoea in El Salvador: case-control study. *BMJ* 2010; **340**: c2825.
67. Braeckman T, Herck K, Meyer N, et al. Effectiveness of rotavirus vaccination in prevention of hospital admissions for rotavirus gastroenteritis among young children in Belgium: Case-control study. *BMJ* 2012; **345**: e4752.
68. Matthijssens J, Zeller M, Heylen E, et al. Higher proportion of G2P[4] rotaviruses in vaccinated hospitalized cases compared with unvaccinated hospitalized cases, despite high vaccine effectiveness against heterotypic G2P[4] rotaviruses. *Clinical microbiology and infection : the official publication of the European Society of Clinical Microbiology and Infectious Diseases* 2014; **20**(10): O702-O10.
69. Castilla J, Beristain X, Martínez-Artola V, et al. Effectiveness of rotavirus vaccines in preventing cases and hospitalizations due to rotavirus gastroenteritis in Navarre, Spain. *Vaccine* 2012; **30**(3): 539-43.
70. Walker JL, Andrews NJ, Atchison CJ, et al. Effectiveness of oral rotavirus vaccination in England against rotavirus-confirmed and all-cause acute gastroenteritis. *Vaccine X* 2019; **1**: 100005.
71. Oberle D, Hoffelner M, Pavel J, et al. Retrospective multicenter matched case-control study on the risk factors for intussusception in infants less than 1 year of age with a special focus on rotavirus vaccines - the German Intussusception Study. *Hum Vaccin Immunother* 2020: 1-14.
72. Gheorghita S, Birca L, Donos A, et al. Impact of Rotavirus Vaccine Introduction and Vaccine Effectiveness in the Republic of Moldova. *Clinical infectious diseases : an official publication of the Infectious Diseases Society of America* 2016; **62 Suppl 2**: S140-S6.
73. Snelling TL, Schultz R, Graham J, et al. Rotavirus and the indigenous children of the Australian outback: Monovalent vaccine effective in a high-burden setting. *Clinical infectious diseases : an official publication of the Infectious Diseases Society of America* 2009; **49**(3): 428-31.
74. Carlin JB, Macartney KK, Lee KJ, et al. Intussusception risk and disease prevention associated with rotavirus vaccines in Australia's national immunization program. *Clinical infectious diseases : an official publication of the Infectious Diseases Society of America* 2013; **57**(10): 1427-34.
75. Julia EM, Keira G, Kathryn G, et al. Rotavirus Epidemiology and Monovalent Rotavirus Vaccine Effectiveness in Australia: 2010-2017. *Pediatrics* 2019; **144**(4): e20191024.
76. Araki K, Hara M, Tsugawa T, et al. Effectiveness of monovalent and pentavalent rotavirus vaccines in Japanese children. *Vaccine* 2018; **36**(34): 5187-93.
77. Araki K, Hara M, Shimano C, Nishida Y, Matsuo M, Tanaka K. Case-Control Study of Rotavirus Vaccine Effectiveness Compared to Test-Negative Controls or Hospital Controls. *J Epidemiol* 2019; **29**(8): 282-7.
78. Lopez AL, Daag JV, Esparagoza J, et al. Effectiveness of monovalent rotavirus vaccine in the Philippines. LID - 10.1038/s41598-018-32595-9 [doi]. *Sci Rep* 2018; **8**(1): 14291.
79. Muhsen K, Anis E, Rubinstein U, et al. Effectiveness of rotavirus pentavalent vaccine under a universal immunization programme in Israel, 2011–2015: a case-control study. *Clinical microbiology and infection : the official publication of the European Society of Clinical Microbiology and Infectious Diseases* 2018; **24**(1): 53-9.
80. Eraliev U, Latipov R, Tursunova D, et al. Rotavirus vaccine effectiveness and impact in Uzbekistan, the first country to introduce in central Asia. *Hum Vaccin Immunother* 2020: 1-7.
81. Chang WC, Yen C, Wu FT, et al. Effectiveness of 2 rotavirus vaccines against rotavirus disease in Taiwanese Infants. *Pediatr Infect Dis J* 2014; **33**(3): e81-e6.
82. Fu C, Wang M, Liang J, He T, Wang D, Xu J. Effectiveness of Lanzhou lamb rotavirus vaccine against rotavirus gastroenteritis requiring hospitalization: A matched case-control study. *Vaccine* 2007; **25**(52): 8756-61.
83. Fu C, He Q, Xu J, et al. Effectiveness of the Lanzhou lamb rotavirus vaccine against gastroenteritis among children. *Vaccine* 2012; **31**(1): 154-8.
84. Zhen SS, Li Y, Wang SM, et al. Effectiveness of the live attenuated rotavirus vaccine produced by a domestic manufacturer in China studied using a population-based case-control design. *Emerg Microbes Infect* 2015; **4**(10): e64.
85. Li J, Zhang Y, Yang Y, et al. Effectiveness of Lanzhou lamb rotavirus vaccine in preventing gastroenteritis among children younger than 5 years of age. *Vaccine* 2019; **37**(27): 3611-6.
86. Patel M, Pedreira C, De Oliveira LH, et al. Association between pentavalent rotavirus vaccine and severe rotavirus diarrhea among children in Nicaragua. *Jama* 2009; **301**(21): 2243-51.
87. Mast TC, Khawaja S, Espinoza F, et al. Case-control study of the effectiveness of vaccination with pentavalent rotavirus vaccine in Nicaragua. *Pediatr Infect Dis J* 2011; **30**(11): e209-e15.
88. Patel M, Pedreira C, De Oliveira LH, et al. Duration of protection of pentavalent rotavirus vaccination in Nicaragua. *Pediatrics* 2012; **130**(2): e365-e72.
89. Gastañaduy PA, Contreras-Roldán I, Bernart C, et al. Effectiveness of Monovalent and Pentavalent Rotavirus Vaccines in Guatemala. *Clinical infectious diseases : an official publication of the Infectious Diseases Society of America* 2016; **62 Suppl 2**: S121-S6.
90. Correia MJB, Patel AM, Nakagomi O, et al. Effectiveness of monovalent rotavirus vaccine (rotarix) against severe diarrhea caused by serotypically unrelated G2P[4] strains in Brazil. *J Infect Dis* 2010; **201**(3): 363-9.
91. Patel MM, Patzi M, Pastor D, et al. Effectiveness of monovalent rotavirus vaccine in Bolivia: case-control study. *BMJ* 2013; **346**: f3726.
92. Ichihara MYT, Rodrigues LC, Teles Santos CAS, et al. Effectiveness of rotavirus vaccine against hospitalized rotavirus diarrhea: A case-control study. *Vaccine* 2014; **32**(23): 2740-7.
93. Justino MCA, Linhares AC, Lanzieri TM, et al. Effectiveness of the monovalent G1P[8] human rotavirus vaccine against hospitalization for severe G2P[4] rotavirus gastroenteritis in Belém, Brazil. *Pediatr Infect Dis J* 2011; **30**(5): 396-401.
94. Patel MM, López-Collada VR, Bulhões MM, et al. Intussusception risk and health benefits of rotavirus vaccination in Mexico and Brazil. *The New England journal of medicine* 2011; **364**(24): 2283-92.

95. Pringle KD, Patzi M, Tate JE, et al. Sustained Effectiveness of Rotavirus Vaccine Against Very Severe Rotavirus Disease Through the Second Year of Life, Bolivia 2013-2014. *Clinical Infectious Diseases* 2016; **62 Suppl 2**: S115-S20.
96. Cotes-Cantillo K, Paternina-Caicedo A, Coronell-Rodríguez W, et al. Effectiveness of the monovalent rotavirus vaccine in Colombia: A case-control study. *Vaccine* 2014; **32**(25): 3035-40.
97. Beres LK, Tate JE, Njobvu L, et al. A Preliminary Assessment of Rotavirus Vaccine Effectiveness in Zambia. *Clinical infectious diseases : an official publication of the Infectious Diseases Society of America* 2016; **62 Suppl 2**: S175-S82.
98. Bar-Zeev N, Kapanda L, Tate JE, et al. Effectiveness of a monovalent rotavirus vaccine in infants in Malawi after programmatic roll-out: An observational and case-control study. *The Lancet Infectious diseases* 2015; **15**(4): 422-8.
99. Groome MJ, Page N, Cortese MM, et al. Effectiveness of monovalent human rotavirus vaccine against admission to hospital for acute rotavirus diarrhoea in South African children: a case-control study. *The Lancet Infectious diseases* 2014; **14**(11): 1096-104.
100. Groome MJ, Tate JE, Arnold M, et al. Evaluation of intussusception after oral monovalent rotavirus vaccination in South Africa. *Clinical infectious diseases : an official publication of the Infectious Diseases Society of America* 2019; pii: ciz431.
101. Gastañaduy PA, Steenhoff AP, Mokomane M, et al. Effectiveness of Monovalent Rotavirus Vaccine after Programmatic Implementation in Botswana: A Multisite Prospective Case-Control Study. *Clinical infectious diseases : an official publication of the Infectious Diseases Society of America* 2016; **62 Suppl 2**: S161-S7.
102. Mokomane M, Tate JE, Steenhoff AP, et al. Evaluation of the Influence of Gastrointestinal Coinfections on Rotavirus Vaccine Effectiveness in Botswana. *Pediatr Infect Dis J* 2018; **37**(3): e58-e62.
103. Armah G, Pringle K, Enweronu-Laryea CC, et al. Impact and Effectiveness of Monovalent Rotavirus Vaccine Against Severe Rotavirus Diarrhea in Ghana. *Clinical infectious diseases : an official publication of the Infectious Diseases Society of America* 2016; **62 Suppl 2**: S200-S7.
104. Bonkougou IJO, Aliabadi N, Leshem E, et al. Impact and effectiveness of pentavalent rotavirus vaccine in children <5 years of age in Burkina Faso. *Vaccine* 2018; **36**(47): 7170-8.
105. Tate JE, Ngabo F, Donnen P, et al. Effectiveness of Pentavalent Rotavirus Vaccine Under Conditions of Routine Use in Rwanda. *Clinical infectious diseases : an official publication of the Infectious Diseases Society of America* 2016; **62 Suppl 2**: S208-12.
106. Mujuru HA, Burnett E, Nathoo KJ, et al. Monovalent Rotavirus Vaccine Effectiveness Against Rotavirus Hospitalizations Among Children in Zimbabwe. *Clinical infectious diseases : an official publication of the Infectious Diseases Society of America* 2018; **69**(8): 1339-44.
107. Khagayi S, Omore R, Otieno GP, et al. Effectiveness of Monovalent Rotavirus Vaccine Against Hospitalization With Acute Rotavirus Gastroenteritis in Kenyan Children. *Clinical infectious diseases : an official publication of the Infectious Diseases Society of America* 2020; **70**(11): 2298-305.
108. Wang FT, Mast TC, Glass RJ, Loughlin J, Seeger JD. Effectiveness of the pentavalent rotavirus vaccine in preventing gastroenteritis in the United States. *Pediatrics* 2010; **125**(2): e208-e13.
109. Wang FT, Mast TC, Glass RJ, Loughlin J, Seeger JD. Effectiveness of an incomplete RotaTeq (RV5) vaccination regimen in preventing rotavirus gastroenteritis in the United States. *Pediatr Infect Dis J* 2013; **32**(3): 278-83.
110. Shui IM, Baggs J, Patel M, et al. Risk of intussusception following administration of a pentavalent rotavirus vaccine in US infants. *Jama* 2012; **307**(6): 598-604.
111. Krishnarajah G, Kageleiry A, Korves C, Lefebvre P, Duh MS. Public health impact of Rotarix vaccination among commercially insured children in the United States. *Vaccine* 2017; **35**(37): 5065-72.
112. Hoffman V, Abu-Elyazeed R, Enger C, et al. Safety study of live, oral human rotavirus vaccine: A cohort study in United States health insurance plans. *Hum Vaccin Immunother* 2018; **14**(7): 1782-90.
113. Gosselin V, Généreux M, Gagneur A, Petit G. Effectiveness of rotavirus vaccine in preventing severe gastroenteritis in young children according to socioeconomic status. *Hum Vaccin Immunother* 2016; **12**(10): 2572-9.
114. Mrozek-Budzyn D, Kieltyka A, Majewska R, Augustyniak M. The effectiveness of rotavirus vaccine in preventing acute gastroenteritis during rotavirus seasons among Polish children. *Arch Med Sci* 2016; **12**(3): 614-20.
115. Pérez-Vilar S, Díez-Domingo J, López-Lacort M, Martínez-Úbeda S, Martínez-Beneito MA. Effectiveness of rotavirus vaccines, licensed but not funded, against rotavirus hospitalizations in the Valencia Region, Spain. *BMC Infect Dis* 2015; **15**: 92.
116. Gagneur A, Nowak E, Lemaitre T, et al. Impact of rotavirus vaccination on hospitalizations for rotavirus diarrhea: The IVANHOE study. *Vaccine* 2011; **29**(21): 3753-9.
117. Muhsen K, Chodick G, Goren S, Shalev V, Cohen D. The uptake of rotavirus vaccine and its effectiveness in preventing acute gastroenteritis in the community. *Vaccine* 2010; **29**(1): 91-4.
118. Zaman K, Sack DA, Neuzil KM, et al. Effectiveness of a live oral human rotavirus vaccine after programmatic introduction in Bangladesh: A cluster-randomized trial. *PLoS Med* 2017; **14**(4): e1002282.
119. Tharmaphornpilas P, Jiamsiri S, Boonchaiya S, et al. Evaluating the first introduction of rotavirus vaccine in Thailand: Moving from evidence to policy. *Vaccine* 2017; **35**(5): 796-801.
120. Vieira SCF, Gurgel RQ, Kirby A, et al. Acute diarrhoea in a community cohort of children who received an oral rotavirus vaccine in Northeast Brazil. *Memorias do Instituto Oswaldo Cruz* 2011; **106**(3): 330-4.
121. Bar-Zeev N, King C, Phiri T, et al. Impact of monovalent rotavirus vaccine on diarrhoea-associated post-neonatal infant mortality in rural communities in Malawi: a population-based birth cohort study. *Lancet Glob Health* 2018; **6**(9): e1036-e44.
